# Supplementary material for: Hierarchical subcomponent self-assembly of covalent triple-stranded complexes with 3d–4f vertices: luminescence and magnetic properties
Source: Royal Society of Chemistry journal article supplement (doi:10.1039/d3dt01139a), 2023-01-01
Supplement: d3dt01139a1.pdf [file d3dt01139a1.pdf]

## Supplementary Material

# Hierarchical Subcomponent Self-Assembly of Covalent Triple-stranded Complex with 3d-4f Vertices: Luminescence and Magnetic Property

Zhi Liu,<sup>a,b</sup> Fan Yin,<sup>a,b</sup> Jian Yang,<sup>b</sup> Xiao-Qing Guo,<sup>b</sup> Li-Peng Zhou,<sup>b</sup> Chong-Bin Tian\*<sup>a,b</sup> and Qing-Fu-Sun\*<sup>a,b</sup>

a. College of Chemistry, Fuzhou University, Fuzhou 350108, People's Republic of China

b. Fujian College, University of Chinese Academy of Sciences, Fuzhou 350002, People's Republic of China.

\* Correspondence to: tianchongbin@fjirsm.ac.cn; qfsun@fjirsm.ac.cn

### Table of contents

|                                                                                                                        |    |
|------------------------------------------------------------------------------------------------------------------------|----|
| 1. General .....                                                                                                       | 2  |
| 2. Synthesis Procedures of ligands <b>1-Ln</b> (Ln=Sm, Eu, Yb, Lu) .....                                               | 3  |
| 3. Self-assembly and characterization of <b>3a-3c-(Ln, Zn)</b> and <b>3<sup>a1</sup>-(Dy, Co)</b> assemblies.<br>..... | 5  |
| 4. UV-Vis and FL spectrum .....                                                                                        | 24 |
| 5. Magnetic Data .....                                                                                                 | 32 |
| 6. Single crystal X-ray diffraction studies.....                                                                       | 33 |
| 7. Continuous shape measurements analysis .....                                                                        | 42 |
| 7. Reference.....                                                                                                      | 44 |

---

## 1. General

All chemicals and solvents were purchased from commercial companies and used without further purification. Anhydrous solvents were distilled according to standard procedures. Deuterated solvents were purchased from Admas and Sigma-Aldrich, 1D and 2D-NMR spectra were measured on a Bruker Biospin Avanced III (400 MHz) spectrometer. <sup>1</sup>H-NMR chemical shifts were determined with respect to residual signals of the deuterated solvents used. ESI-MS spectra of **3a-3c-(Gd, Zn)** were recorded on LC-QTOF-MS (G6520B), while ESI-TOF-MS spectra of other compounds were recorded on an Impact II UHRTOF mass spectrometry from Bruker, with tuning mix as the internal standard. Data analysis was conducted with the Bruker Data Analysis software (Version 4.3) and simulations were performed with the Bruker Isotope Pattern software and Thermo Xcalibur Qual Browser software (Thermo Foundation 2.0). UV-vis spectra are recorded on UV-2700 UV-vis spectrophotometer from SHIMADZU. Excitation and emission spectra were recorded on the FS5 spectrofluorometer from Edinburg Photonics. Power X-Ray diffraction (P-XRD) data were collected using Miniflex600 (Cu - K $\alpha$  radiation:  $\lambda = 1.54056 \text{ \AA}$ ) in the range of  $5^\circ < 2\theta < 40^\circ$ . Unless otherwise specified, all experiments have been carried out at room temperature (298 K). Thermogravimetric analyses were performed using a GA/NETZSCH STA449C instrument heated from 30–1200 °C (heating rate of 10 °C min<sup>-1</sup>, nitrogen stream). Elemental analyses of C, H, and N were measured using a Vario EL III elemental analyzer. Magnetic data were collected with a Quantum Design MPMS XL superconducting quantum interference device (SQUID) magnetometer. Diamagnetic corrections were made using Pascal's constants. The empirical molecular formula for **3a'-(Dy, Co)** was determined according to the results of element analyses and TGA data.

## 2. Synthesis Procedures of ligands 1-Ln (Ln=Sm, Eu, Yb, Lu)

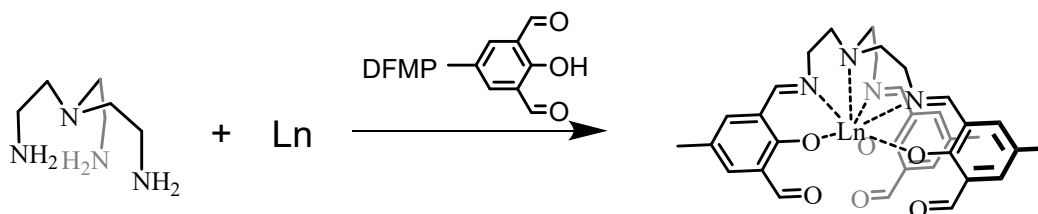

**Scheme S1.** The synthetic route of 1-Ln

The compounds of 2,6-Diformyl-p-cresol (DFMP), **1-Dy**, **1-Yb** and **1-Lu** were synthesized following the literature procedure<sup>1,2</sup>.

### Synthesis of ligands 1-Eu.

The synthetic progress of **1-Eu** is the same as that of **1-Sm** except that  $\text{Eu}(\text{NO}_3)_3 \cdot 6\text{H}_2\text{O}$  (326 mg, 0.73 mmol) was used.  $^1\text{H}$  NMR (400 MHz,  $\text{DMSO}-d_6$ )  $\delta$  7.87 (s, 1H), 5.77 (s, 1H), 4.41 (s, 1H), 1.21 (s, 3H), -1.60 ~ -2.04 (m, 2H), -2.53 ~ -3.08 (m, 2H), -16.63 (s, 1H). ESI-MS: calcd. for  $[\text{M}+\text{Na}]^+$ : 757.1508, found 757.1496.

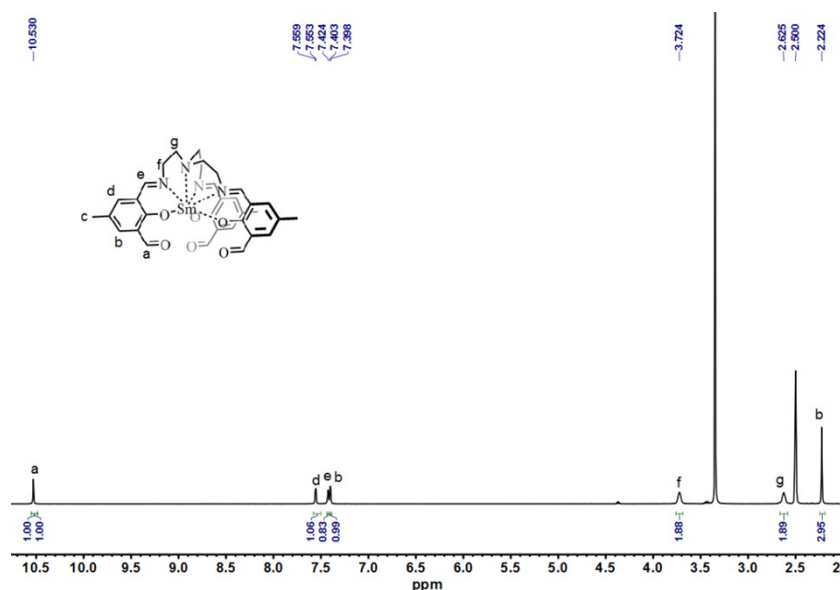

**Figure S1.**  $^1\text{H}$  NMR spectrum of **1-Sm** (400 MHz,  $\text{DMSO}-d_6$ , 298 K).

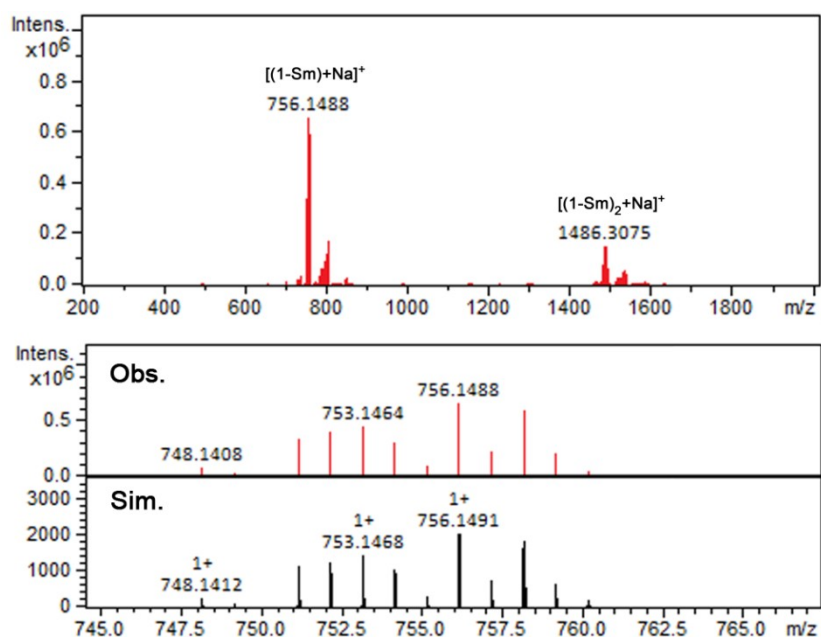

**Figure S2.** ESI-TOF-MS spectrum of **1-Sm** with insets showing the observed and simulated isotopic patterns of the +1 peak.

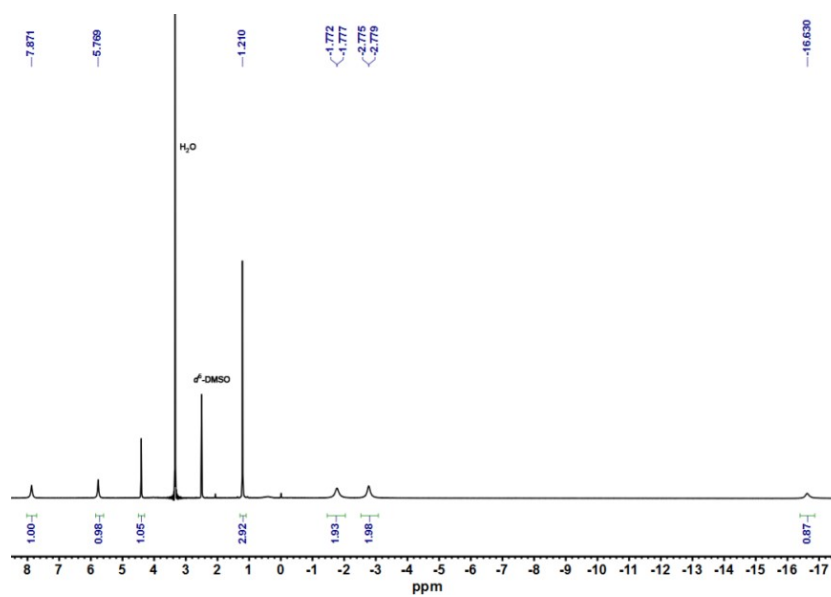

**Figure S3.** <sup>1</sup>H NMR spectrum of **1-Eu** (400 MHz, DMSO-*d*<sub>6</sub>, 298 K).

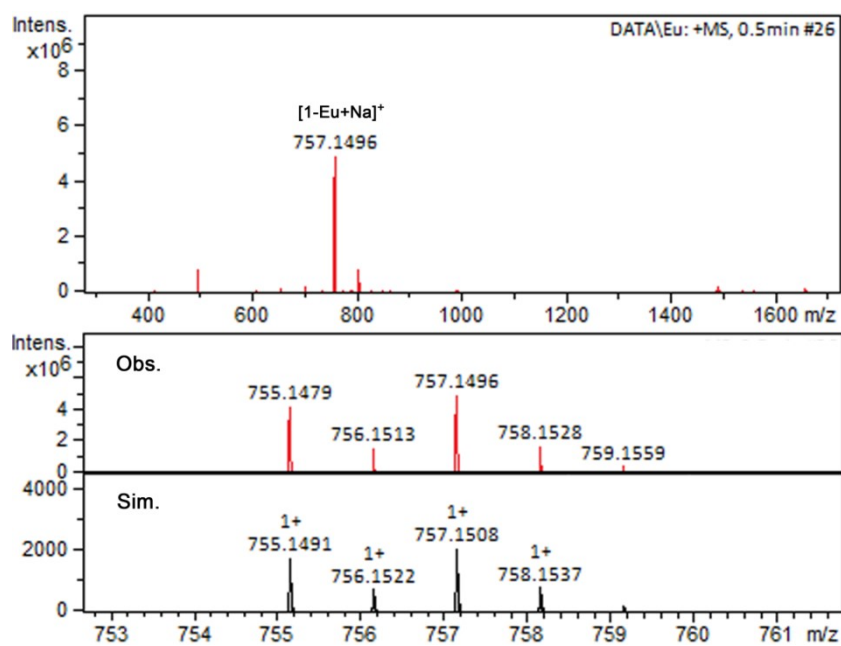

**Figure S4.** ESI-TOF-MS spectrum of **1-Eu** with insets showing the observed and simulated isotopic patterns of the +1 peak.

### 3. Self-assembly and characterization of **3a-3b-(Ln, Zn)** and **3a'-(Dy, Co)** assemblies.

The synthesis procedure of **3a-(Sm, Zn)** is in the text.

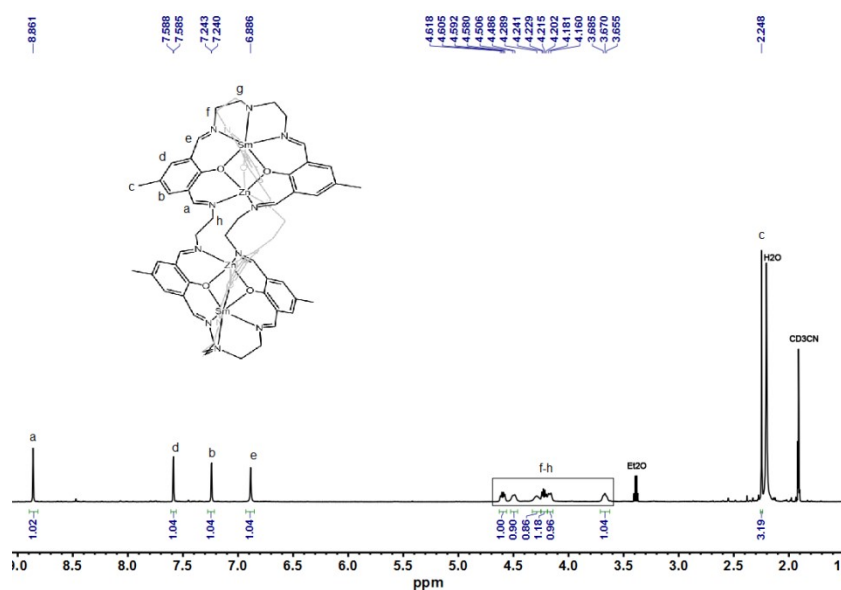

**Figure S5.** <sup>1</sup>H NMR spectrum of **3a-(Sm, Zn)** (400 MHz, CD<sub>3</sub>CN, 298 K).

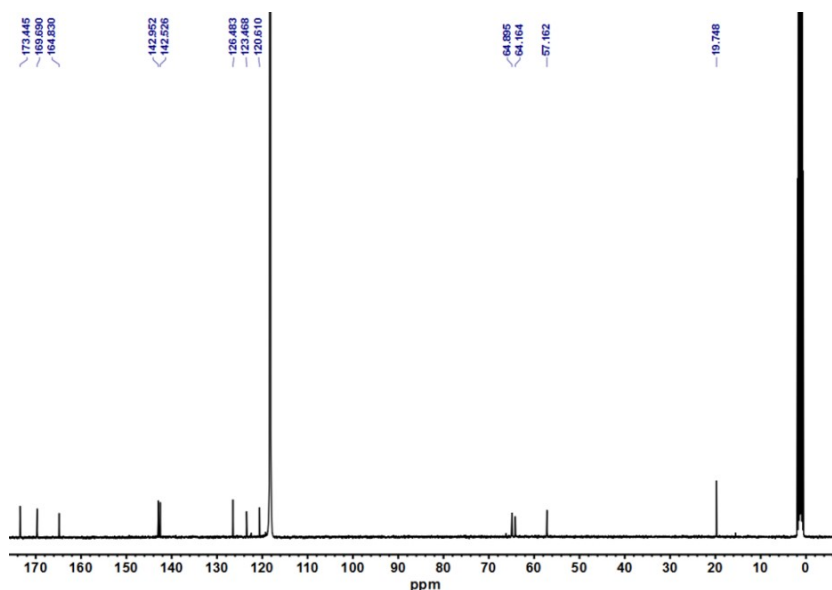

**Figure S6.** <sup>13</sup>C NMR spectrum of **3a-(Sm, Zn)** (101 MHz, CD<sub>3</sub>CN, 298 K).

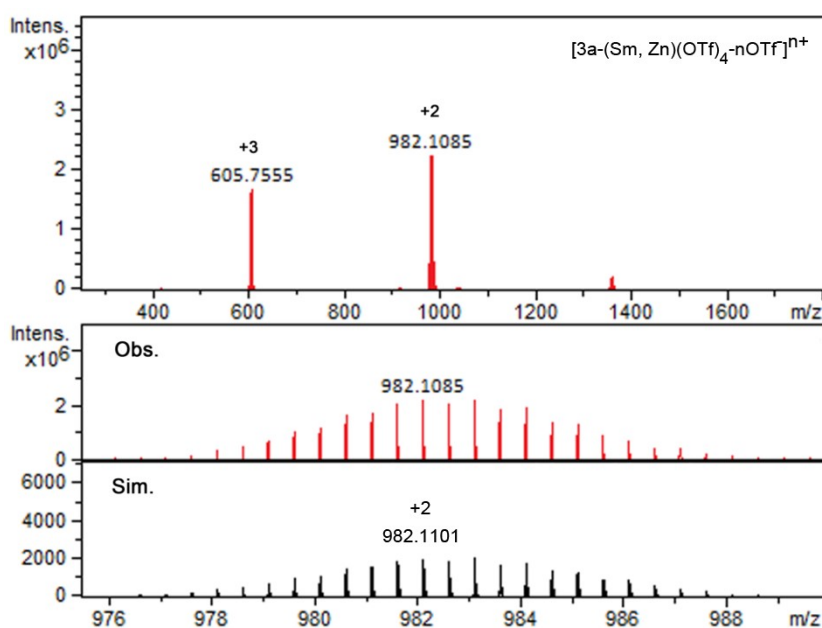

**Figure S7.** ESI-TOF-MS spectrum of **3a-(Sm, Zn)** with insets showing the observed and simulated isotopic patterns of the +2 peak.

**3a-(Eu, Zn):** The synthetic progress of **3a-(Eu, Zn)** is similar with the procedure of **3a-(Sm, Zn)**. <sup>1</sup>H NMR (400 MHz, CD<sub>3</sub>CN) δ 7.53 (s, 1H), 6.29 (s, 1H), 4.92 (s, 1H), 1.90 (s, 3H), 1.56 – 1.36 (m, 1H), -0.02 ~ -0.25 (m, 1H), -3.33 ~ -5.48 (m, 2H), -10.37 (s, 1H), -21.62 (s, 1H). ESI-TOF-MS for **3a-(Eu, Zn)**: the following picked signals are those at the highest intensities. *m/z* calcd. for [3a-(Eu, Zn)(OTf)<sub>2</sub>]<sup>2+</sup> 984.1116, found 984.1092; calcd. for [3a-(Eu, Zn)(OTf)<sub>1</sub>]<sup>3+</sup> 606.4236, found 606.4230.

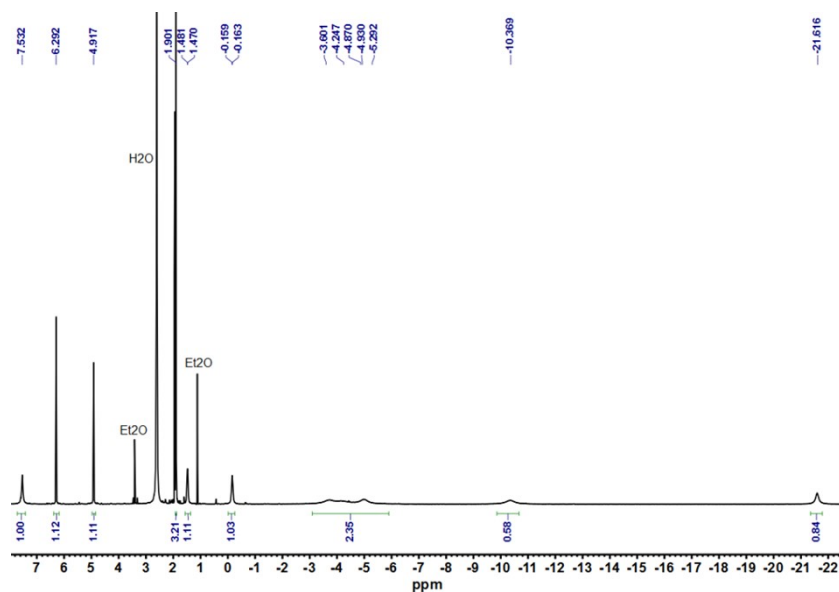

**Figure S8.**  $^1\text{H}$  NMR spectrum of **3a-(Eu, Zn)** (400 MHz,  $\text{CD}_3\text{CN}$ , 298 K).

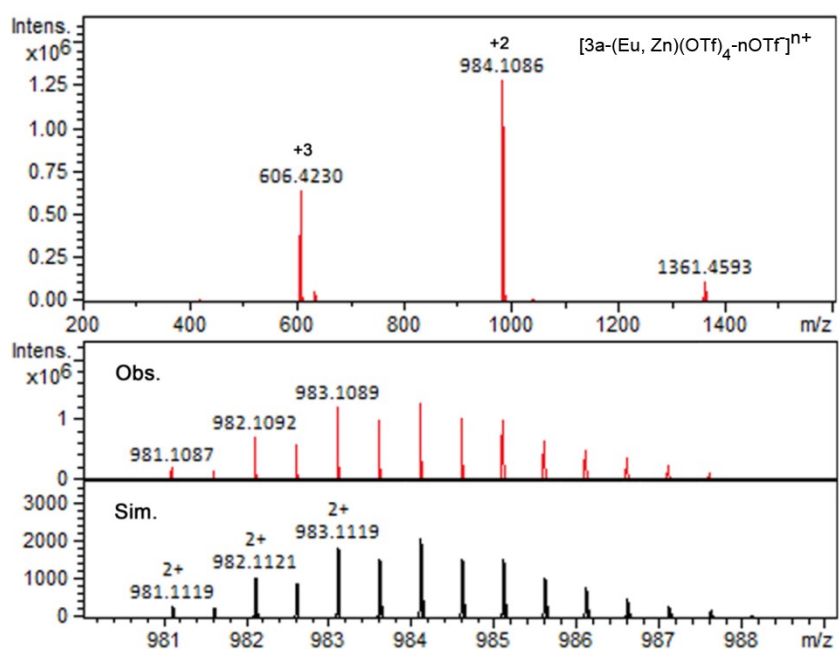

**Figure S9.** ESI-TOF-MS spectrum of **3a-(Eu, Zn)** with insets showing the observed and simulated isotopic patterns of the +2 peak.

**3a-(Yb, Zn):** The synthetic progress of **3a-(Yb, Zn)** is similar with the procedure of **3a-(Sm, Zn)**. ESI-TOF-MS for **3a-(Yb, Zn)**: the following picked signals are those at the highest intensities.  $m/z$  calcd. for  $[\mathbf{3a-(Yb, Zn)(OTf)}_2]^{2+}$  1005.1296, found 1005.1275; calcd. for  $[\mathbf{3a-(Yb, Zn)(OTf)}_1]^{3+}$  620.4356, found 620.4342.

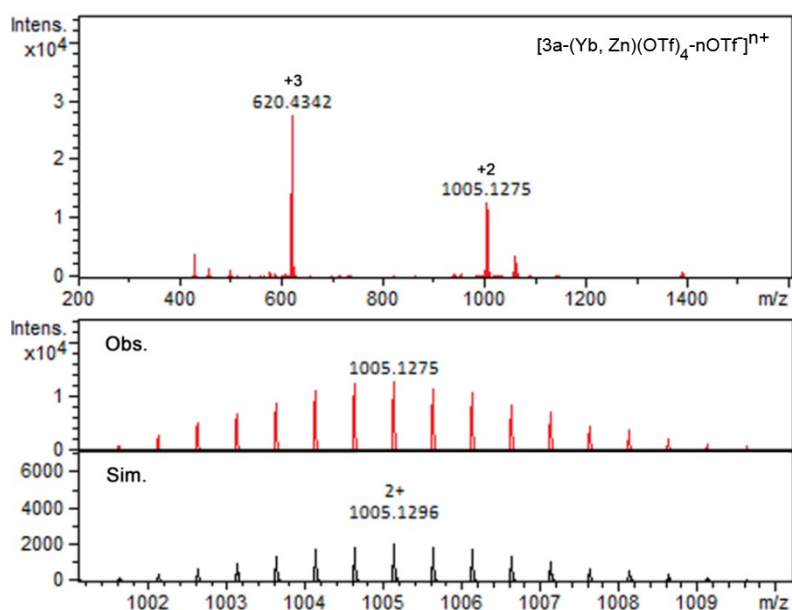

**Figure S10.** ESI-TOF-MS spectrum of **3a-(Yb, Zn)** with insets showing the observed and simulated isotopic patterns of the +2 peak.

**3a-(Lu, Zn):** The synthetic progress of **3a-(Lu, Zn)** is similar with the procedure of **3a-(Sm, Zn)**. <sup>1</sup>H NMR (400 MHz, CD<sub>3</sub>CN) δ 8.50 (s, 1H), 8.31 (s, 1H), 7.53 (d, J = 1.7 Hz, 1H), 7.40 (d, J = 1.7 Hz, 1H), 3.90 (td, 1H), 3.77 ~ 3.70 (m, 1H), 3.68 (s, 2H), 3.36 ~ 3.26 (m, 1H), 2.95 (td, J = 9.1, 4.7 Hz, 1H), 2.31 (s, 3H). ESI-TOF-MS for **3a-(Lu, Zn)**: the following picked signals are those at the highest intensities. *m/z* calcd. for [**3a-(Lu, Zn)(OTf)<sub>2</sub>**]<sup>2+</sup> 1007.1304, found 1007.1304; calcd. for [**3a-(Lu, Zn)(OTf)<sub>1</sub>**]<sup>3+</sup> 621.7703, found 621.7695.

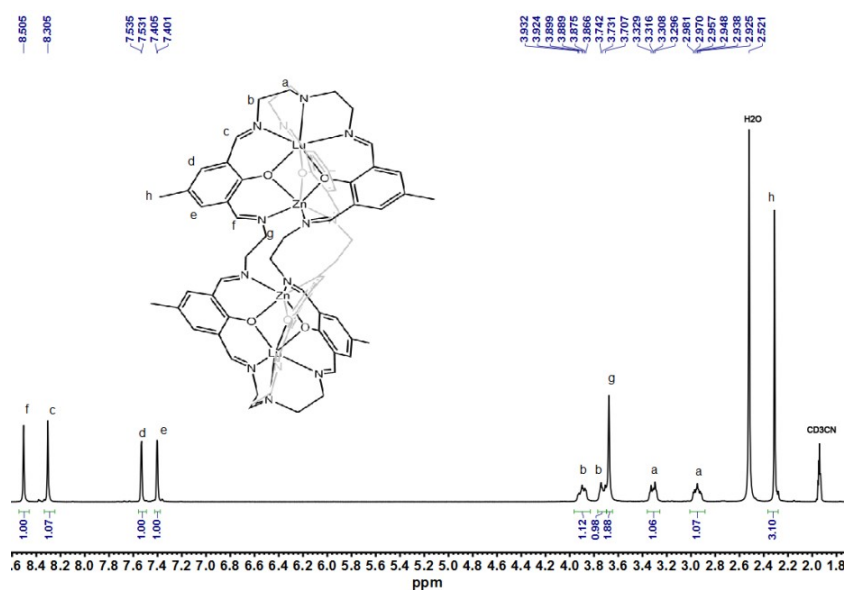

**Figure S11.** <sup>1</sup>H NMR spectrum of **3a-(Lu, Zn)** (400 MHz, CD<sub>3</sub>CN, 298 K).



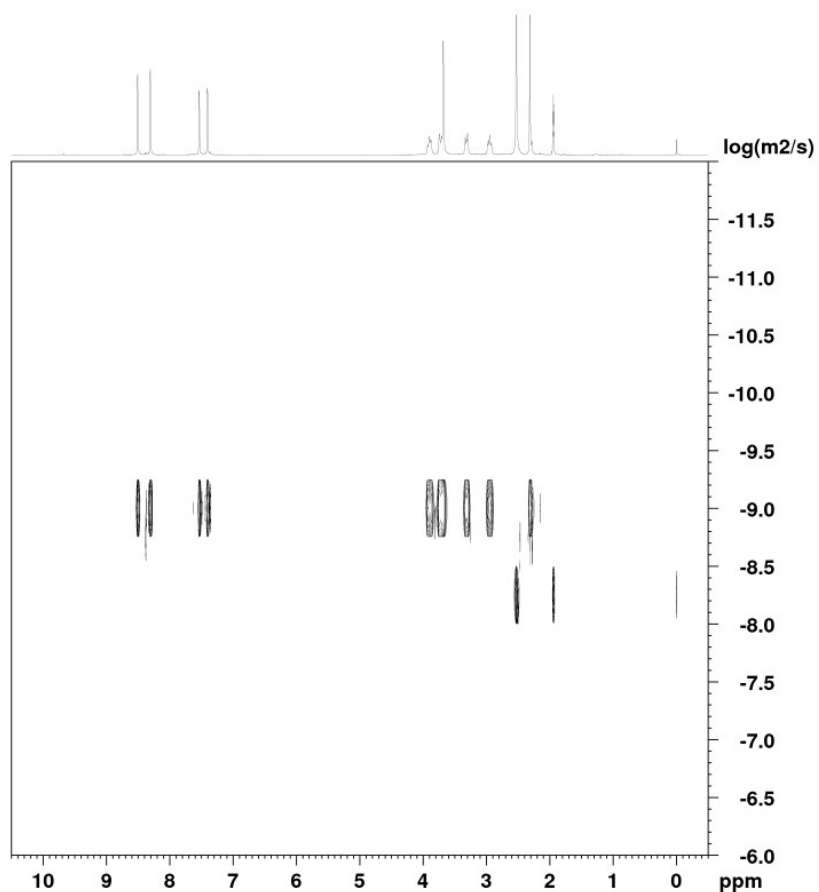

**Figure S12.**  $^1\text{H}$  DOSY NMR spectrum of **3a-(Lu, Zn)** (400 MHz,  $\text{CD}_3\text{CN}$ , 298K).

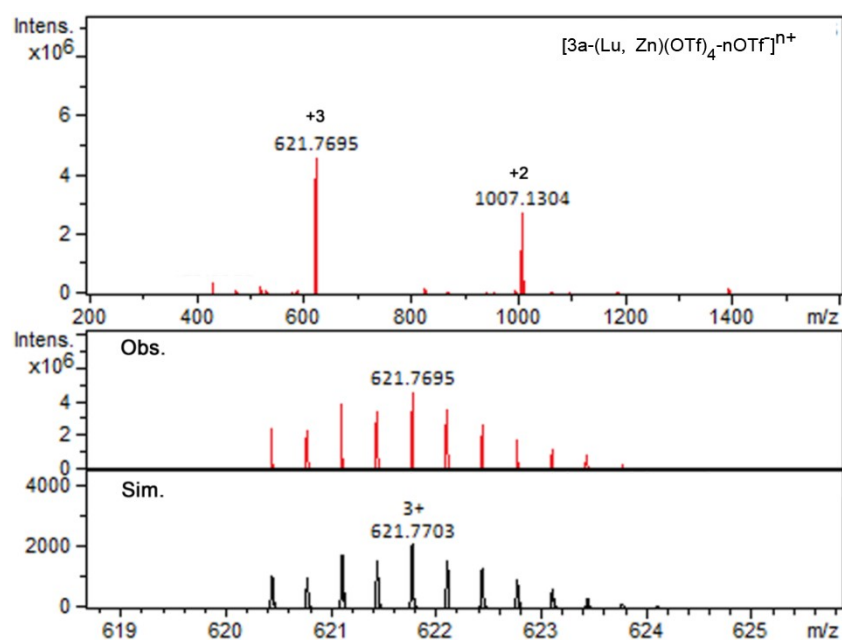

**Figure S13.** ESI-TOF-MS spectrum of **3a-(Lu, Zn)** with insets showing the observed and simulated isotopic patterns of the +3 peak.

**3a-(Gd, Zn):** The synthetic progress of **3a-(Gd, Zn)** is similar with the procedure of **3a-(Sm, Zn)**. ESI-TOF-MS for **3a-(Gd, Zn)**: the following picked signals are those at the highest intensities.  $m/z$  calcd. for  $[\mathbf{3a-(Gd, Zn)(OTf)_2}]^{2+}$  989.11, found 989.11; calcd. for  $[\mathbf{3a-(Gd, Zn)(OTf)_1}]^{3+}$  609.76, found 609.76.

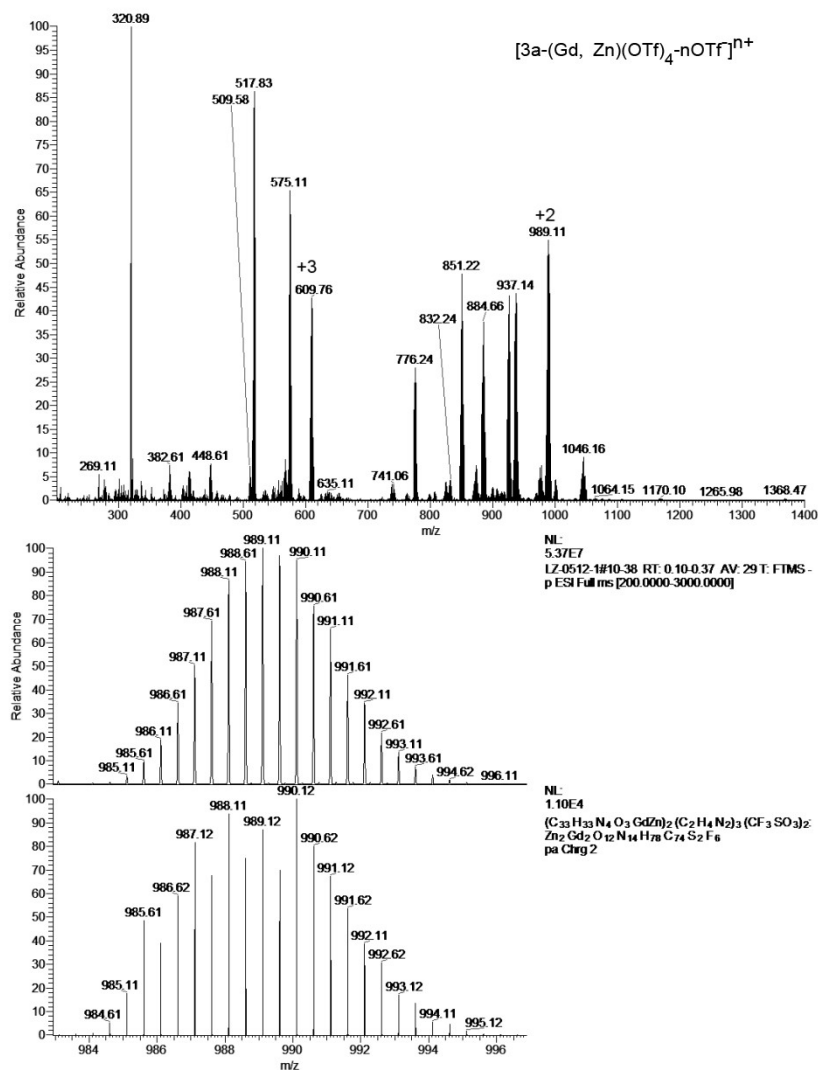

**Figure S14.** ESI-TOF-MS spectrum of **3a-(Gd, Zn)** with insets showing the observed and simulated isotopic patterns of the +2 peak.

**3a'-(Dy, Co):** The synthetic progress of **3a'-(Dy, Co)** is the same as that of Synthesis of **3a-(Sm, Zn)** except that **1-Dy** and  $\text{Co(OTf)}_2$  were used. ESI-TOF-MS: calcd. for  $[\mathbf{3a'-(Dy, Co)(OTf)_2}]^{2+}$ : 988.1250, found 988.1240; calcd.  $[\mathbf{3a'-(Dy, Co)(OTf)_1}]^{3+}$ : 609.0992, found 609.0986. Anal. calcd. for  $\text{C}_{82}\text{H}_{89}\text{N}_{17}\text{O}_{19}\text{S}_4\text{F}_{12}\text{Dy}_2\text{Co}_2$  (2415.24): C 40.74; H 3.71; N 9.86; found: C 40.70; H 3.833; N 9.83.

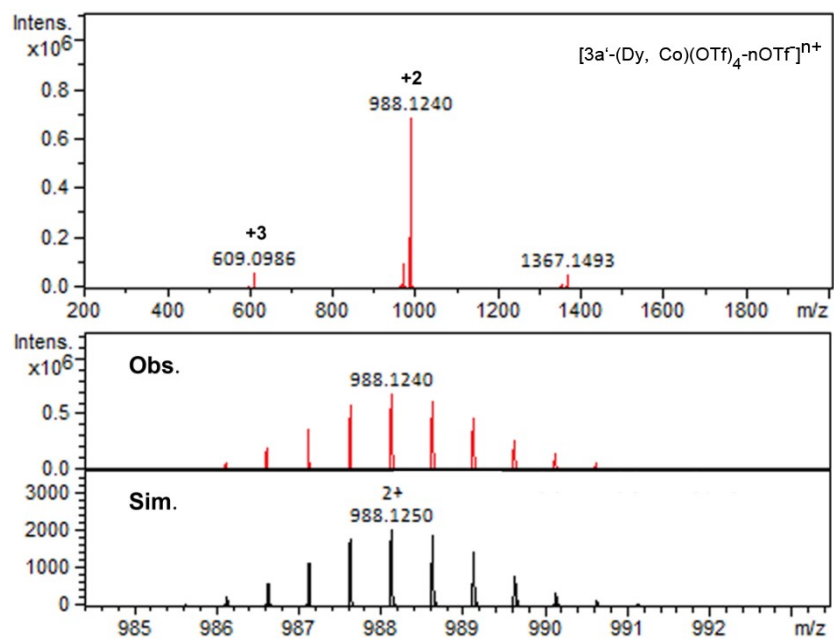

**Figure S15.** ESI-TOF-MS spectrum of  $3a'-(Dy, Co)$  with insets showing the observed and simulated isotopic patterns of the  $+2$  peak.

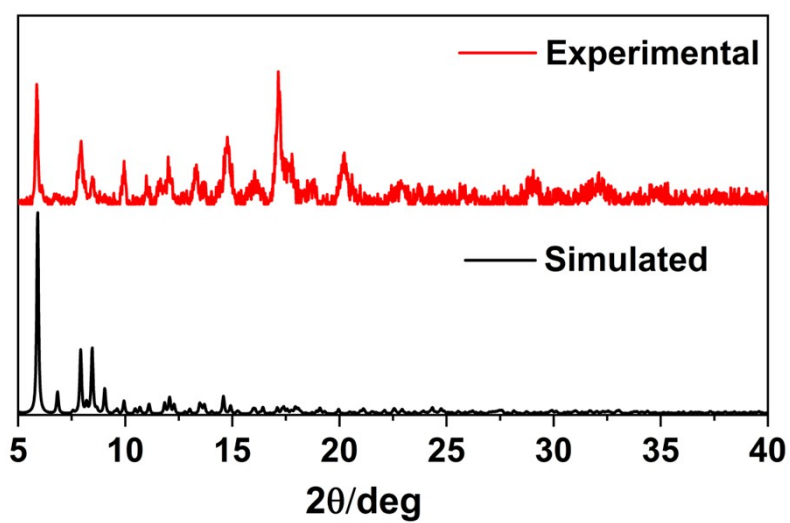

**Figure S16.** PXRD data of  $3a'-(Dy, Co)$ .

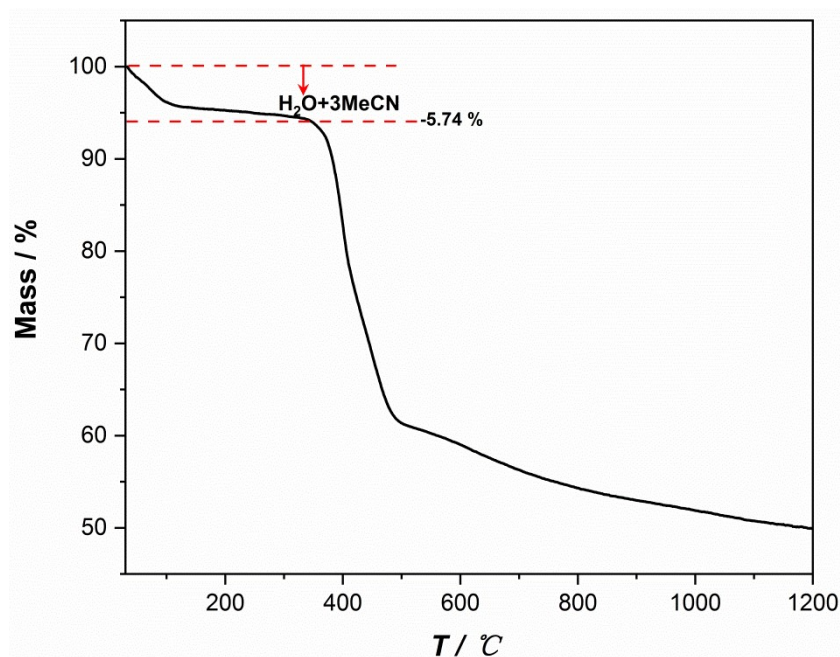

**Figure S17.** TG profiles for complex **3a'-(Dy, Co)**.

The self-assembly reactions of **3b-3c-(Ln, Zn)** were proceeded in similar procedures as **3a-(Ln, Zn)**.

**3b-(Sm, Zn):**  $^1\text{H}$  NMR (600 MHz,  $\text{CD}_3\text{CN}$ )  $\delta$  8.33 (s, 1H), 7.52 (d,  $J = 2.0$  Hz, 1H), 7.39 (d,  $J = 7.6$  Hz, 1H), 7.34 (d,  $J = 2.0$  Hz, 1H), 7.15 (d,  $J = 7.6$  Hz, 1H), 6.99 (s, 1H), 6.82 (d,  $J = 7.6$  Hz, 1H), 5.61 (d,  $J = 7.6$  Hz, 1H), 4.69 ~ 4.61 (m, 1H), 4.47 (s, 1H), 4.20 (s, 1H), 4.18 (s, 1H), 3.88 (s, 1H), 2.26 (s, 3H).  $^{13}\text{C}$  NMR (101 MHz, Acetonitrile- $d_3$ )  $\delta$  177.17, 170.27, 165.09, 152.14, 144.20, 143.69, 141.38, 131.44, 130.34, 127.07, 125.18, 123.94, 123.02, 121.23, 65.33, 64.65, 40.11, 19.73. ESI-TOF-MS for **3b-(Sm, Zn)**: the following picked signals are those at the highest intensities.  $m/z$  calcd. for **[3b-(Sm, Zn)(OTf) $_2$ ] $^{2+}$**  1190.1810, found 1190.1812; calcd. for **[3b-(Sm, Zn)(OTf) $_1$ ] $^{3+}$**  743.8032, found 743.8033; calcd. for **[3b-(Sm, Zn)] $^{4+}$**  520.6143, found 520.6147.

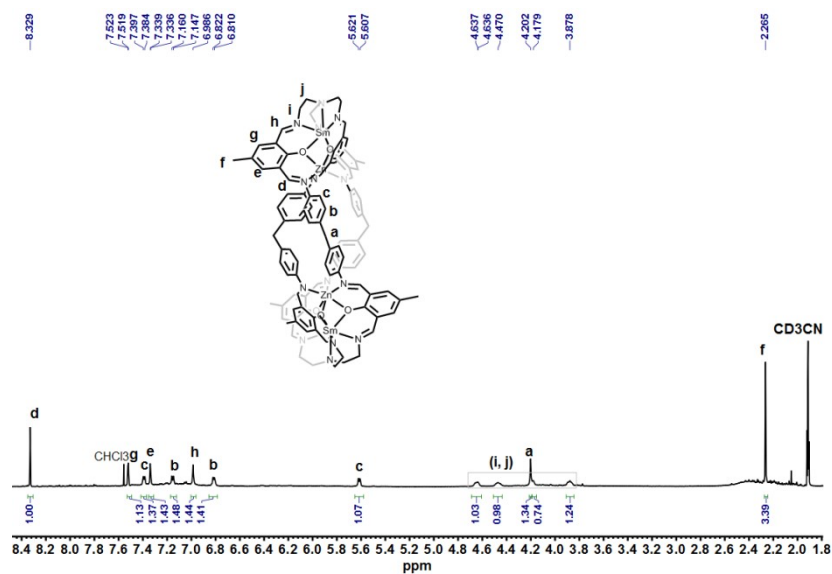

**Figure S18.** <sup>1</sup>H NMR spectrum of **3b-(Sm, Zn)** (600 MHz, CD<sub>3</sub>CN, 298 K).

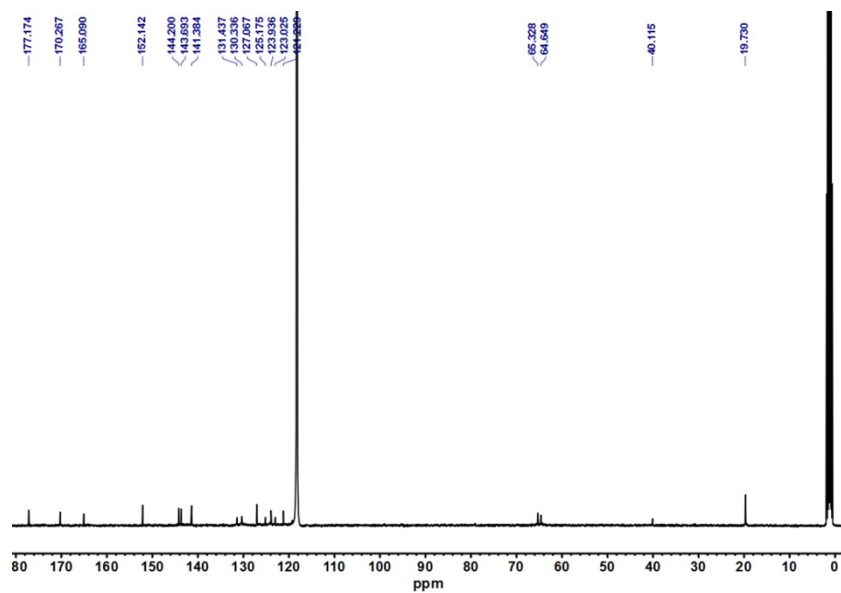

**Figure S19.** <sup>13</sup>C NMR spectrum of **3b-(Sm, Zn)** (101 MHz, CD<sub>3</sub>CN, 298 K).

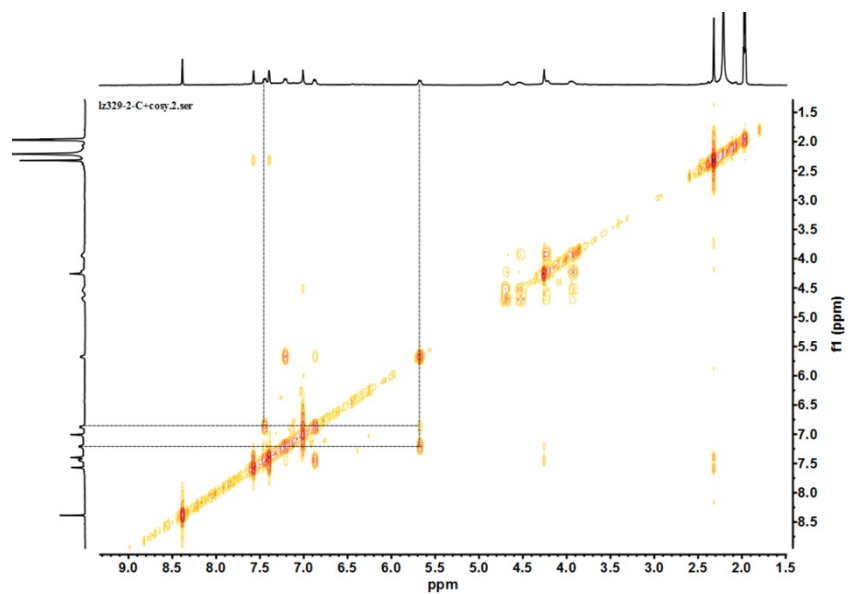

**Figure S20.**  $^1\text{H}$ - $^1\text{H}$  COSY NMR spectrum of **3b-(Sm, Zn)** (400 MHz,  $\text{CD}_3\text{CN}$ , 298 K).

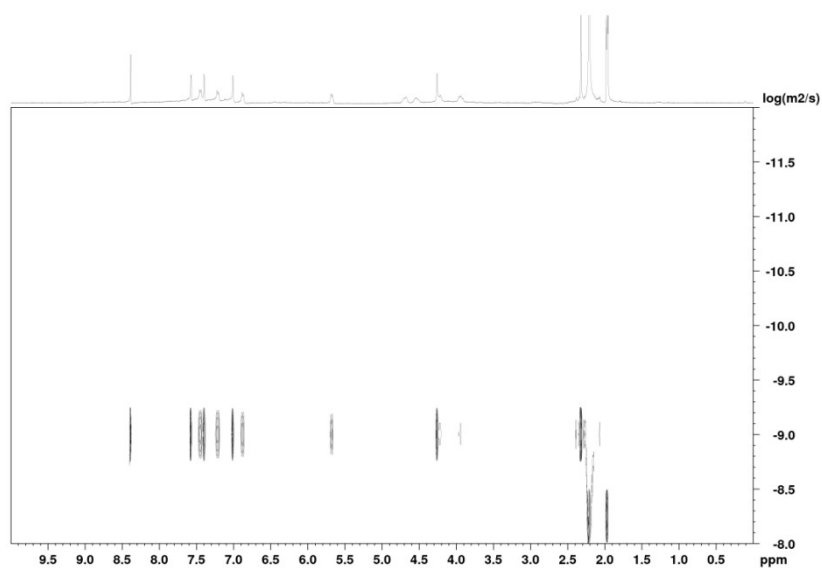

**Figure S21.**  $^1\text{H}$  DOSY NMR spectrum of **3b-(Sm, Zn)** (400 MHz,  $\text{CD}_3\text{CN}$ , 298 K).

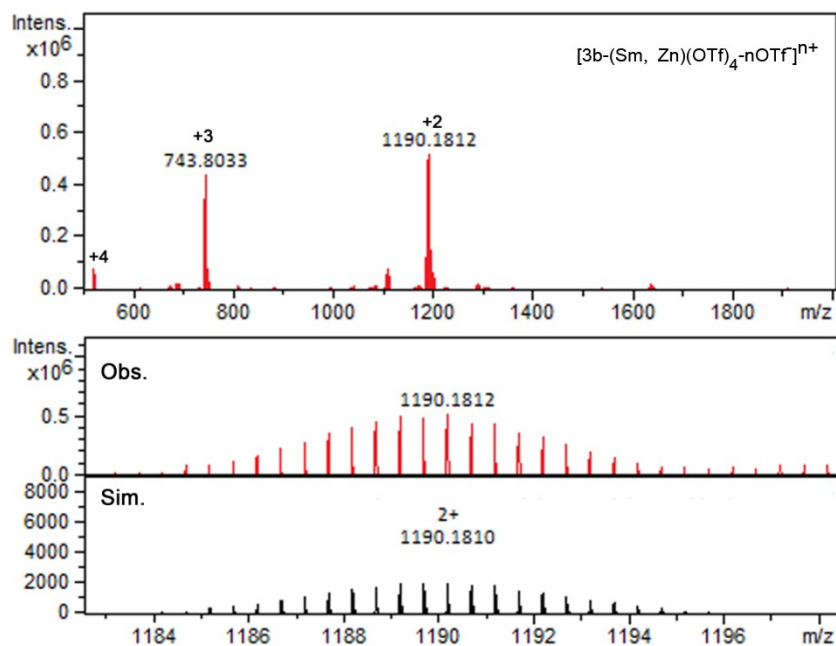

**Figure S22.** ESI-TOF-MS spectrum of **3b-(Sm, Zn)** with insets showing the observed and simulated isotopic patterns of the +2 peak.

**3b-(Eu, Zn):** ESI-TOF-MS for **3b-(Eu, Zn)**: the following picked signals are those at the highest intensities.  $m/z$  calcd. for  $[3b-(\text{Eu}, \text{Zn})(\text{OTf})_2]^{2+}$  1191.1828, found 1191.1833; calcd. for  $[3b-(\text{Eu}, \text{Zn})(\text{OTf})_1]^{3+}$  744.4710, found 744.4714.

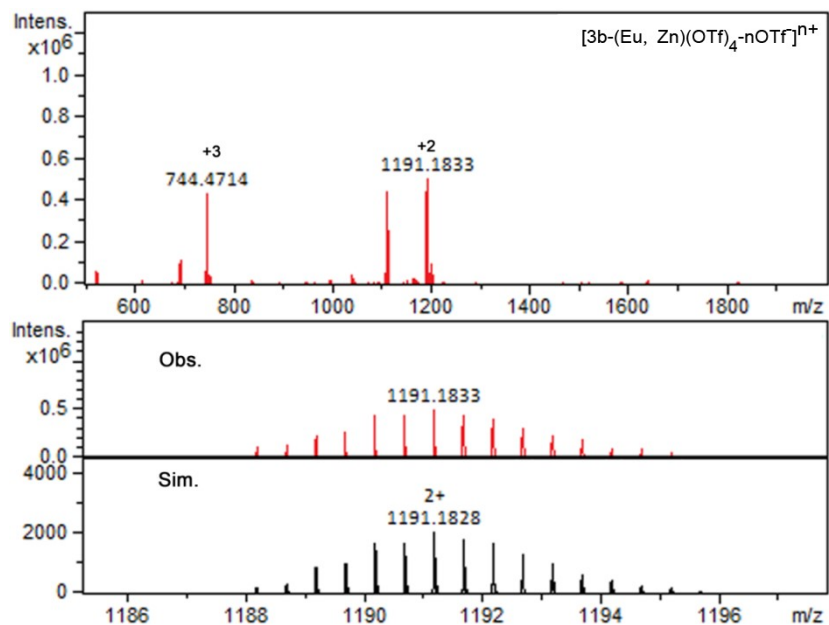

**Figure S23.** ESI-TOF-MS spectrum of **3b-(Eu, Zn)** with insets showing the observed and simulated isotopic patterns of the +2 peak.

**3b-(Yb, Zn):** ESI-TOF-MS for **3b-(Yb, Zn)**: the following picked signals are those at the highest intensities.  $m/z$  calcd. for  $[\mathbf{3b-(Yb, Zn)(OTf)_2}]^{2+}$  1212.2005, found 1212.1999; calcd. for  $[\mathbf{3b-(Yb, Zn)(OTf)_1}]^{3+}$  758.4829, found 758.4825.

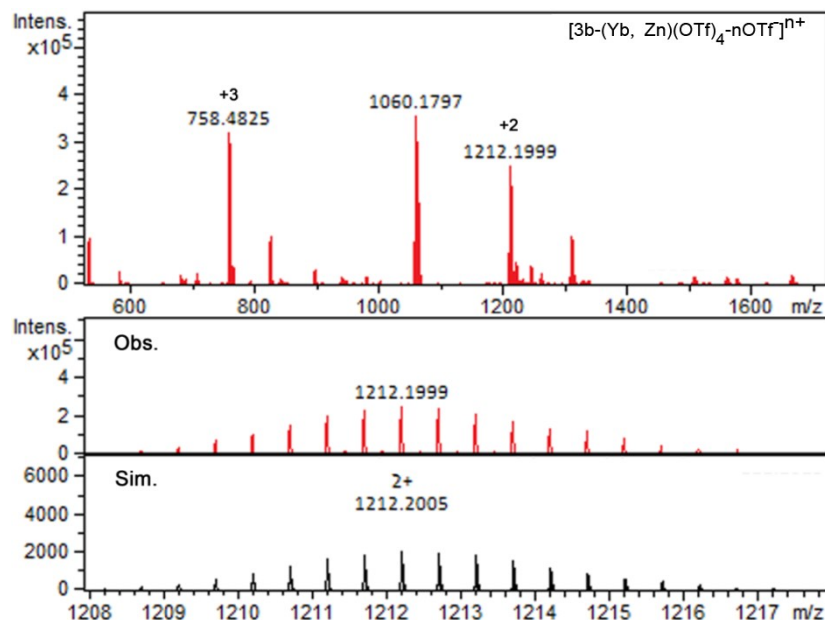

**Figure S24.** ESI-TOF-MS spectrum of **3b-(Yb, Zn)** with insets showing the observed and simulated isotopic patterns of the +2 peak.

**3b-(Lu, Zn):** ESI-TOF-MS for **3b-(Lu, Zn)**: the following picked signals are those at the highest intensities.  $m/z$  calcd. for  $[\mathbf{3b-(Lu, Zn)(OTf)_2}]^{2+}$  1214.2030, found 1214.2024; calcd. for  $[\mathbf{3b-(Lu, Zn)(OTf)_1}]^{3+}$  759.8178, found 759.8176.

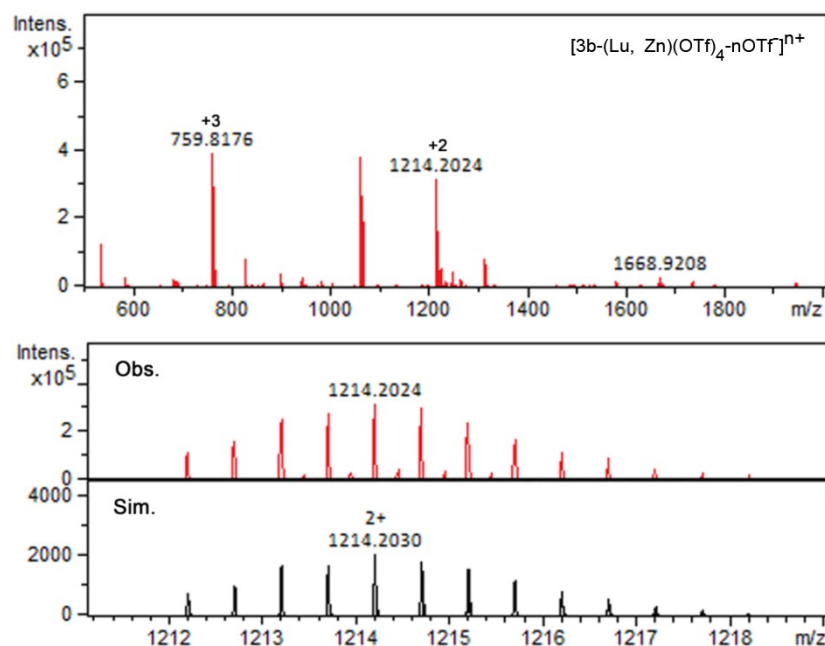

**Figure S25.** ESI-TOF-MS spectrum of **3b-(Lu, Zn)** with insets showing the observed and simulated isotopic patterns of the +2 peak.



**3b-(Gd, Zn):** ESI-TOF-MS for **3b-(Gd, Zn)**: the following picked signals are those at the highest intensities.  $m/z$  calcd. for  $[\mathbf{3b-(Gd, Zn)(OTf)_2}]^{2+}$  1196.19, found 1191.19; calcd. for  $[\mathbf{3b-(Gd, Zn)(OTf)_1}]^{3+}$  747.81, found 747.81; calcd. for  $[\mathbf{3b-(Gd, Zn)(OTf)_1}]^{4+}$  523.62, found 523.62.

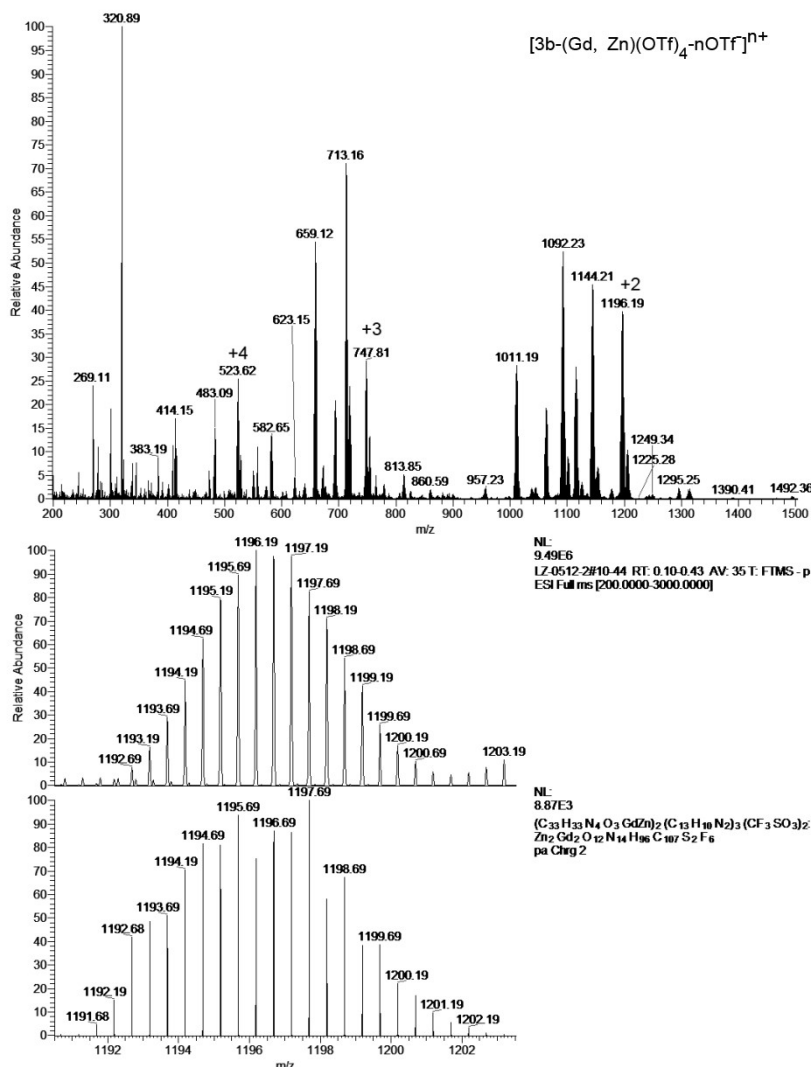

**Figure S26.** ESI-TOF-MS spectrum of **3b-(Gd, Zn)** with insets showing the observed and simulated isotopic patterns of the +2 peak.

**3c-(Sm, Zn):**  $^1\text{H}$  NMR (600 MHz,  $\text{CD}_3\text{CN}$ )  $\delta$  8.39 (s, 1H), 7.49 (d,  $J = 2.0$  Hz, 1H), 7.48 – 7.45 (m, 1H), 7.32 (d,  $J = 2.0$  Hz, 1H), 7.03 (dd,  $J = 8.4, 2.4$  Hz, 1H), 6.98 (s, 1H), 6.94 (d,  $J = 8.8$  Hz, 1H), 6.75 (d,  $J = 8.8$  Hz, 1H), 6.72 (dd,  $J = 8.4, 2.4$  Hz, 1H), 5.79 (dd,  $J = 8.4, 2.4$  Hz, 1H), 4.65 (d,  $J = 12.6$  Hz, 1H), 4.44 (s, 1H), 4.21 (d,  $J = 12.6$  Hz, 1H), 3.90 (s, 1H), 2.23 (s, 3H). ESI-TOF-MS for **3c-(Sm, Zn)**: the following picked signals are those at the highest intensities.  $m/z$  calcd. for  $[\mathbf{3c-(Sm, Zn)(OTf)_2}]^{2+}$  1196.19, found 1191.19; calcd. for  $[\mathbf{3c-(Sm, Zn)(OTf)_1}]^{3+}$  747.81, found 747.81; calcd. for  $[\mathbf{3c-(Sm, Zn)(OTf)_1}]^{4+}$  523.62, found 523.62.

$\text{Zn}(\text{OTf})_2^{2+}$  1328.2373, found 1328.2371; calcd. for  $[\mathbf{3c}-(\text{Sm}, \text{Zn})(\text{OTf})_1]^{3+}$   
835.8407, found 835.8412; calcd. for  $[\mathbf{3c}-(\text{Sm}, \text{Zn})]^{4+}$  589.6425, found 589.6431.

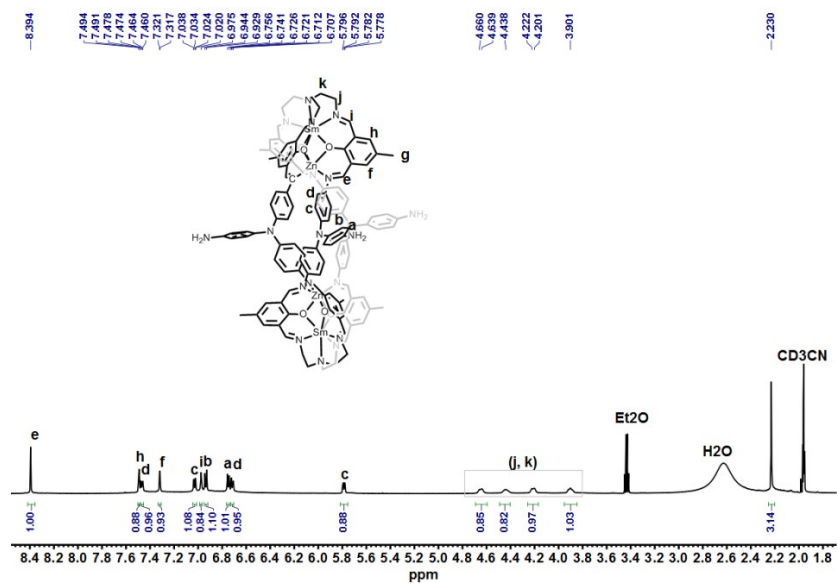

Figure S27.  $^1\text{H}$  NMR spectrum of  $\mathbf{3c}-(\text{Sm}, \text{Zn})$ , (600 MHz,  $\text{CD}_3\text{CN}$ , 298 K).

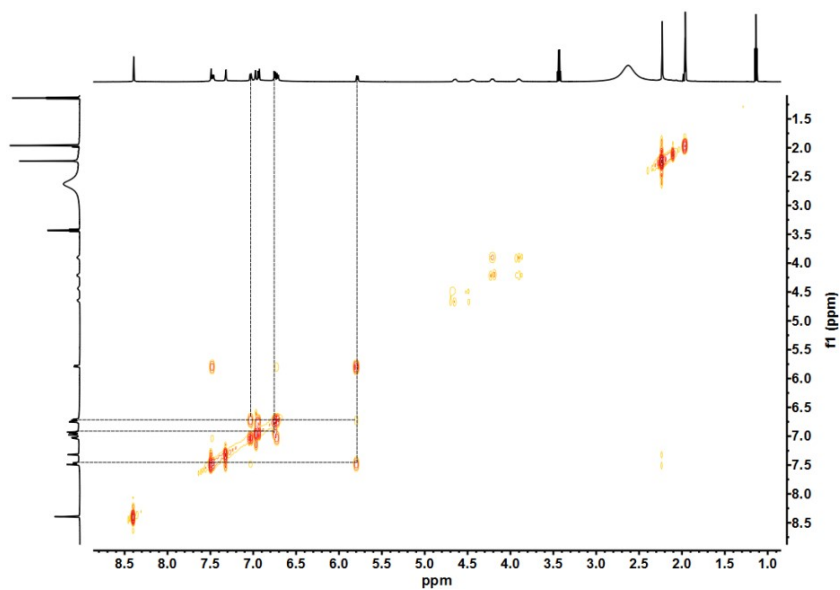

Figure S28.  $^1\text{H}$ - $^1\text{H}$  COSY NMR spectrum of  $\mathbf{3c}-(\text{Sm}, \text{Zn})$  (400 MHz,  $\text{CD}_3\text{CN}$ , 298 K).

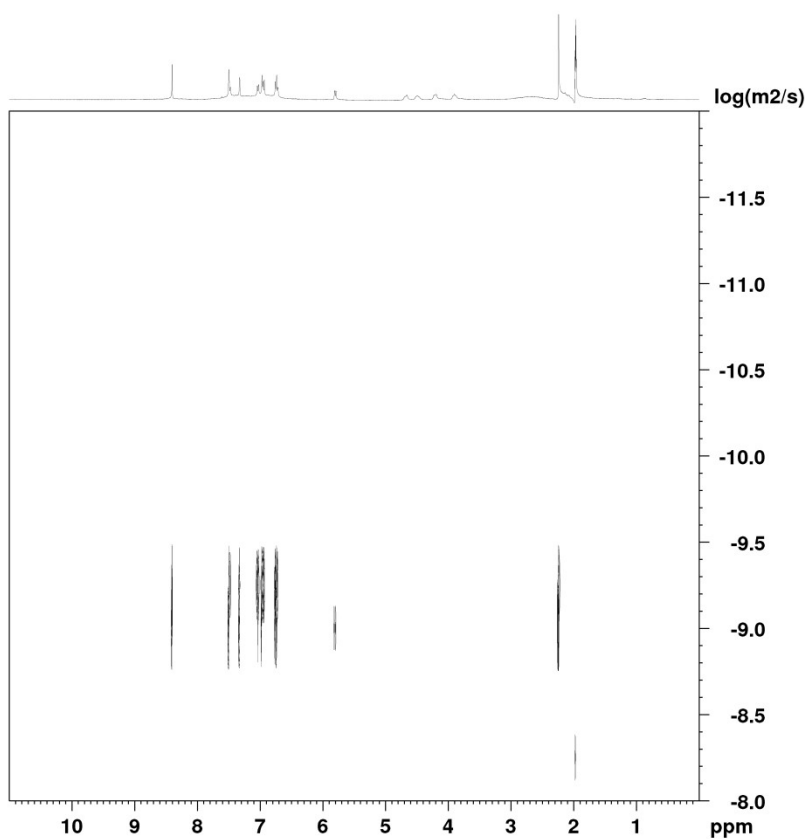

**Figure S29.**  $^1\text{H}$  DOSY NMR spectrum of **3c-(Sm, Zn)** (400 MHz,  $\text{CD}_3\text{CN}$ , 298 K).

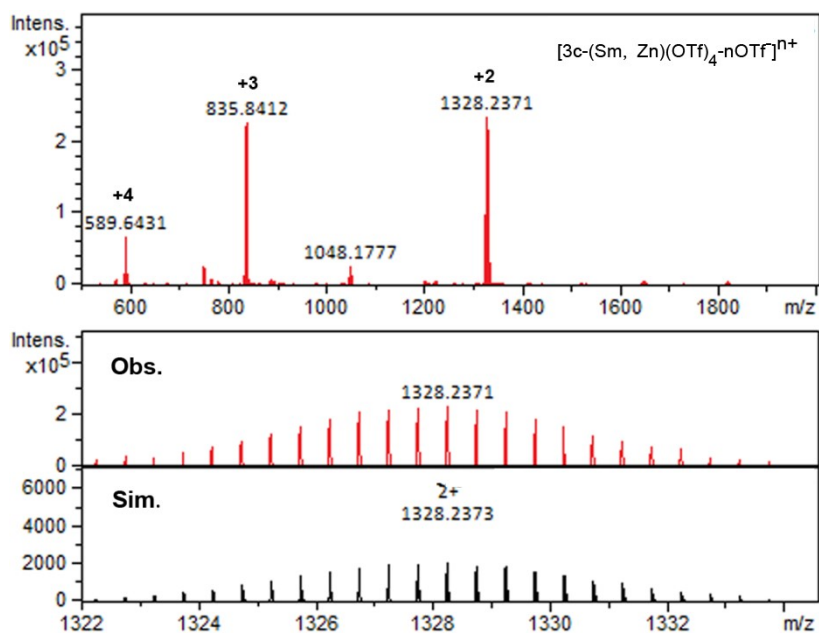

**Figure S30.** ESI-TOF-MS spectrum of **3c-(Sm, Zn)** with insets showing the observed and simulated isotopic patterns of the +2 peak.

**3c-(Eu, Zn):** ESI-TOF-MS for **3c-(Eu, Zn)**: the following picked signals are those at the highest intensities.  $m/z$  calcd. for  $[\mathbf{3c-(Eu, Zn)(OTf)_2}]^{2+}$  1329.2393, found

1329.2392; calcd. for  $[\mathbf{3c}\text{-}(\text{Eu}, \text{Zn})(\text{OTf})_1]^{3+}$  836.5087, found 836.5095; calcd. for  $[\mathbf{3c}\text{-}(\text{Eu}, \text{Zn})]^{4+}$  590.1434, found 590.1440.

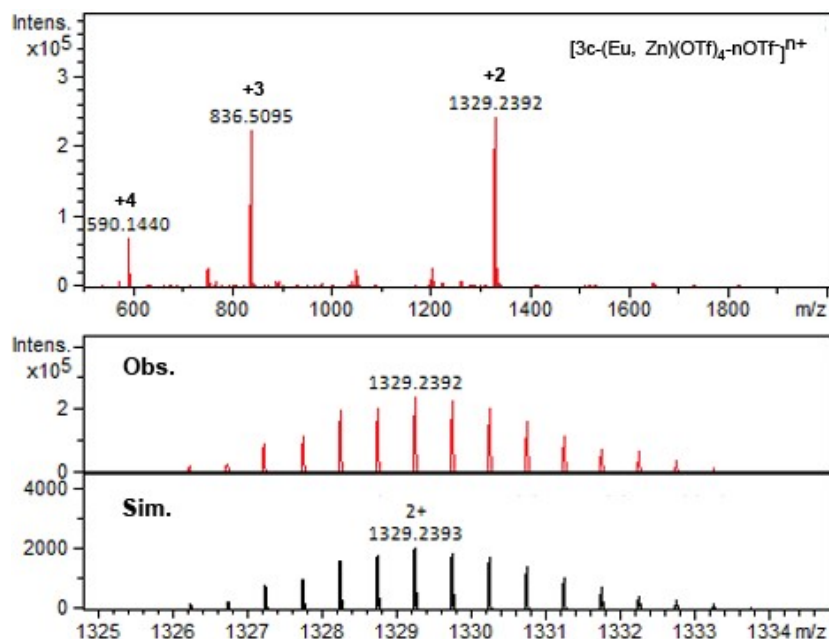

**Figure S31.** ESI-TOF-MS spectrum of  $\mathbf{3c}\text{-}(\text{Eu}, \text{Zn})$  with insets showing the observed and simulated isotopic patterns of the +2 peak.

**$\mathbf{3c}\text{-}(\text{Yb}, \text{Zn})$ :** ESI-TOF-MS for  $\mathbf{3c}\text{-}(\text{Yb}, \text{Zn})$ : the following picked signals are those at the highest intensities.  $m/z$  calcd. for  $[\mathbf{3c}\text{-}(\text{Yb}, \text{Zn})(\text{OTf})_2]^{2+}$  1350.2569, found 1350.2562; calcd. for  $[\mathbf{3c}\text{-}(\text{Yb}, \text{Zn})(\text{OTf})_1]^{3+}$  850.5204, found 850.5206; calcd. for  $[\mathbf{3c}\text{-}(\text{Yb}, \text{Zn})]^{4+}$  600.6522, found 600.6521.

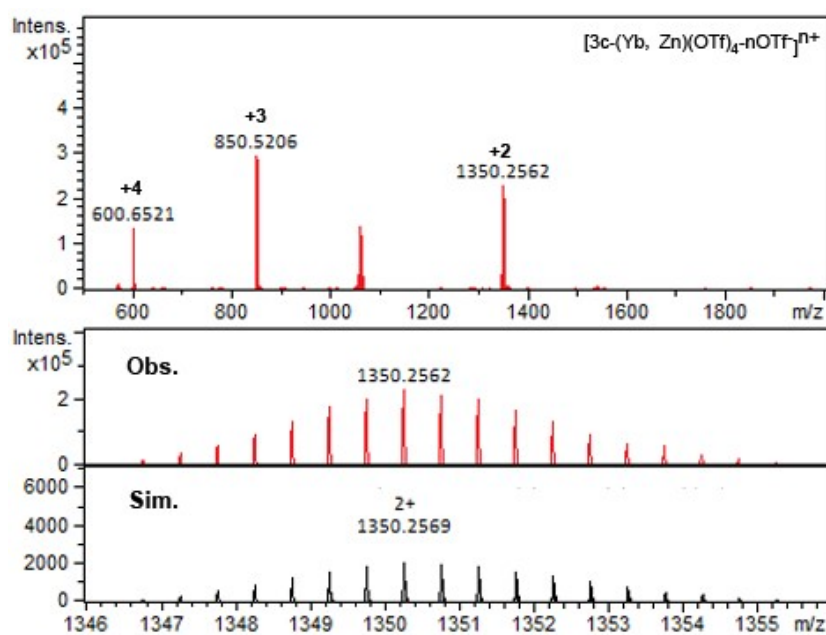

**Figure S32.** ESI-TOF-MS spectrum of **3c-(Yb, Zn)** with insets showing the observed and simulated isotopic patterns of the +2 peak.

**3c-(Lu, Zn):**  $^1\text{H}$  NMR (400 MHz,  $\text{CD}_3\text{CN}$ )  $\delta$  8.44 (s, 1H), 8.10 (s, 1H), 7.55 (s, 1H), 7.51 (s, 1H), 7.15 (d,  $J = 8.0$  Hz, 1H), 6.80 (d,  $J = 8.0$  Hz, 1H), 6.77 (d, 1H), 6.62 (d,  $J = 8.0$  Hz, 1H), 6.22 (d,  $J = 8.0$  Hz, 1H), 5.34 (d,  $J = 8.0$  Hz, 1H), 4.18 (s, 1H), 3.98 (s, 1H), 3.85 (s, 1H), 3.39 (s, 1H), 3.04 (s, 1H), 2.32 (s, 3H). ESI-TOF-MS for **3c-(Lu, Zn)**: the following picked signals are those at the highest intensities.  $m/z$  calcd. for  $[\mathbf{3c-(Lu, Zn)(OTf)}_2]^{2+}$  1352.2595, found 1352.2591; calcd. for  $[\mathbf{3c-(Lu, Zn)(OTf)}_1]^{3+}$  851.8555, found 851.8557; calcd. for  $[\mathbf{3c-(Lu, Zn)}]^{4+}$  601.6535, found 601.6538.

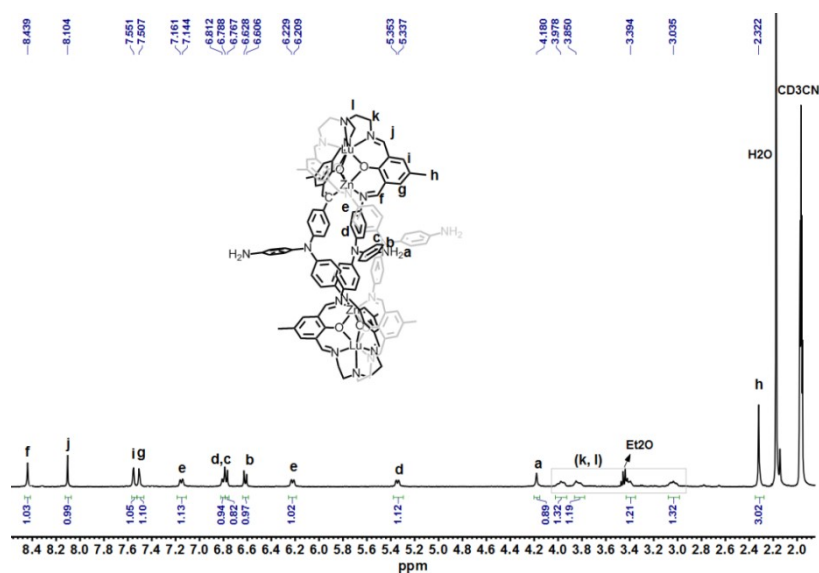

**Figure S33.**  $^1\text{H}$  NMR spectrum of **3c-(Lu, Zn)** (400 MHz,  $\text{CD}_3\text{CN}$ , 298 K).

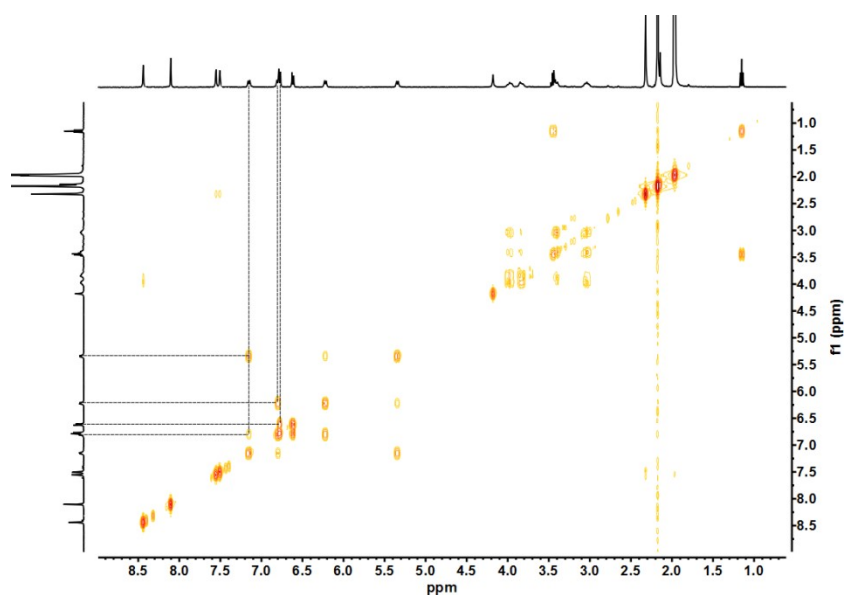

**Figure S34.**  $^1\text{H}$ - $^1\text{H}$  COSY NMR spectrum of **3c-(Lu, Zn)** (400 MHz,  $\text{CD}_3\text{CN}$ , 298 K).

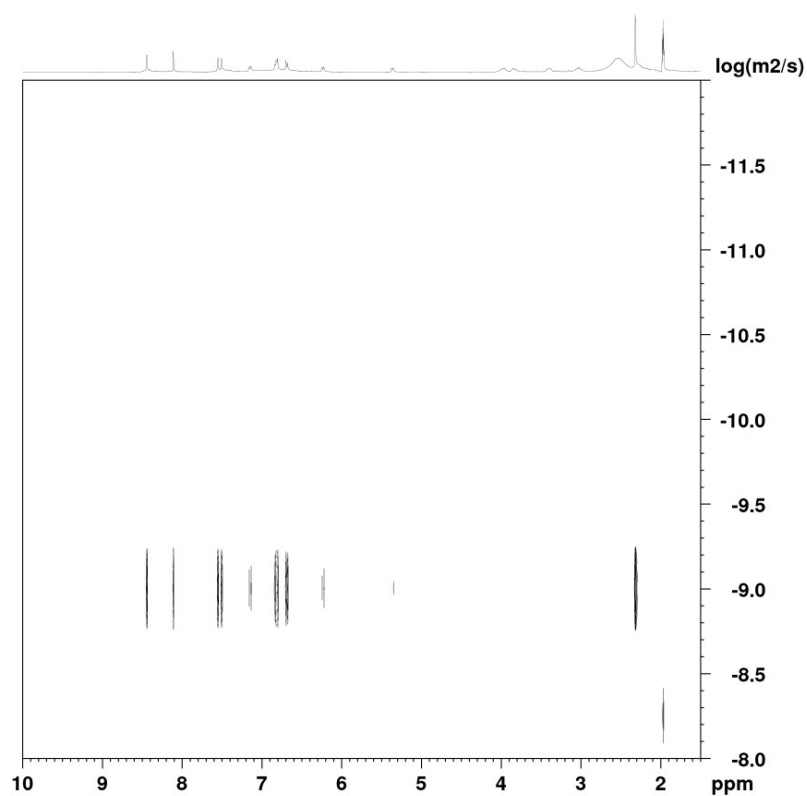

**Figure S35.**  $^1\text{H}$  DOSY NMR spectrum of **3c-(Lu, Zn)** (400 MHz,  $\text{CD}_3\text{CN}$ , 298 K).

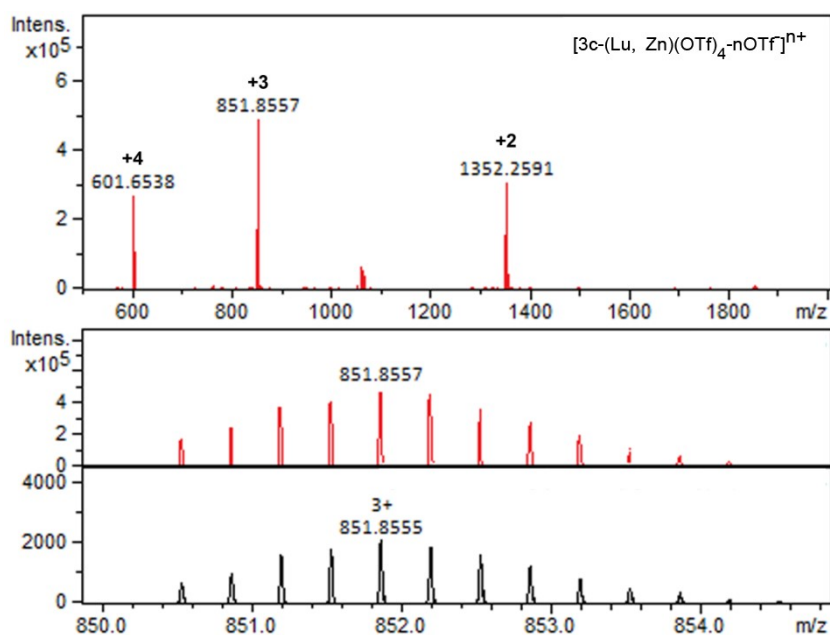

**Figure S36.** ESI-TOF-MS spectrum of **3c-(Lu, Zn)** with insets showing the observed and simulated isotopic patterns of the +3 peak.

**3c-(Gd, Zn):** ESI-TOF-MS for **3c-(Gd, Zn)**: the following picked signals are those at the highest intensities.  $m/z$  calcd. for  $[\mathbf{3c-(Gd, Zn)(OTf)}_2]^{2+}$  1334.74, found 1334.74; calcd. for  $[\mathbf{3c-(Gd, Zn)(OTf)}_1]^{3+}$  839.84, found 839.84; calcd. for  $[\mathbf{3c-(Gd, Zn)}]^{4+}$  592.65, found 592.65.

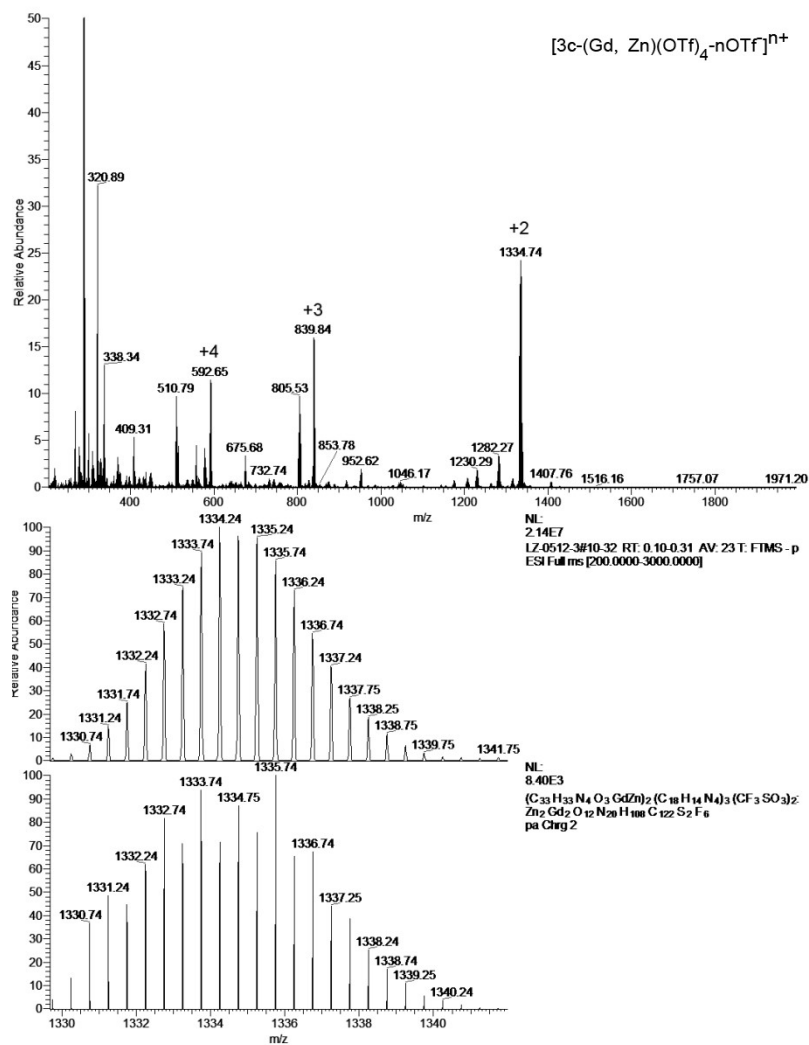

**Figure S37.** ESI-TOF-MS spectrum of **3c-(Gd, Zn)** with insets showing the observed and simulated isotopic patterns of the  $+2$  peak.

#### 4. UV-Vis and FL spectrum

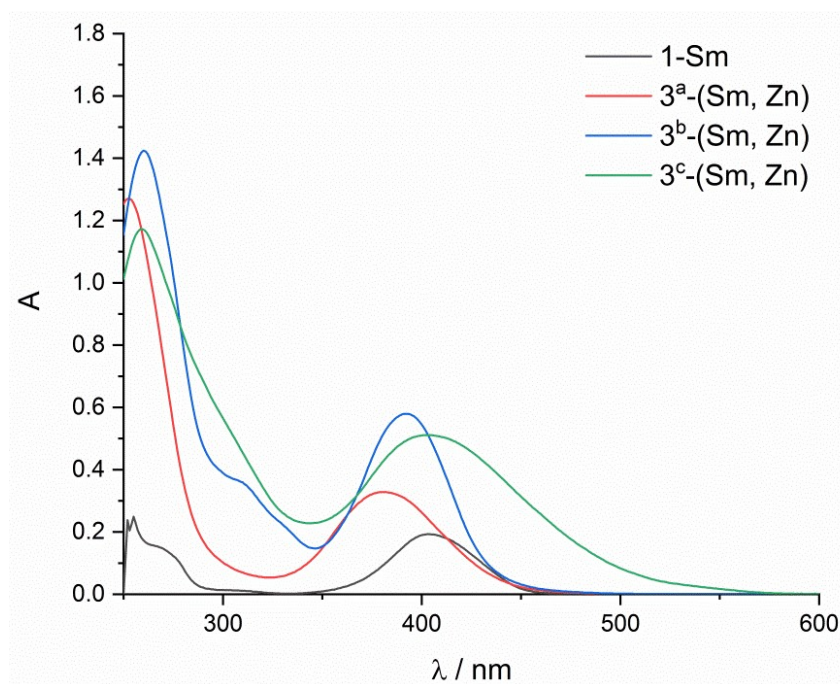

**Figure S38.** UV-Vis absorption spectra of **1-Sm** ( $1.0 \times 10^{-5}$  M in MeCN), **3a-(Sm, Zn)** ( $1.0 \times 10^{-5}$  M in MeCN), **3b-(Sm, Zn)** ( $1.0 \times 10^{-5}$  M in MeCN), **3c-(Sm, Zn)** ( $1.0 \times 10^{-5}$  M in MeCN) at 298 K.

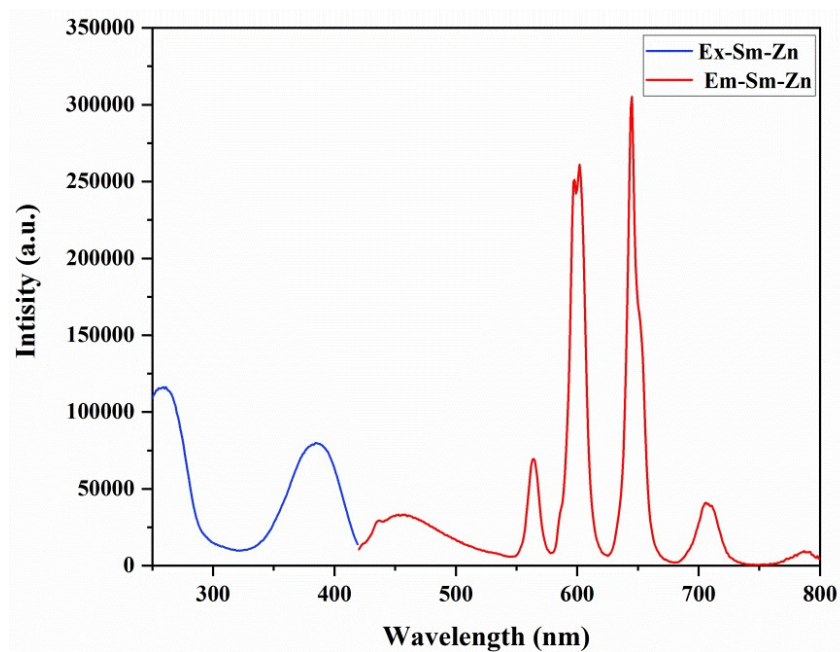

**Figure S39.** Excitation (blue line) and emission (red line, for the visible region only) of **3a-(Sm, Zn)**. ( $1.0 \times 10^{-5}$  M;  $\lambda_{\text{ex}} = 386$  nm,  $\lambda_{\text{em}} = 645$  nm, slits = 3-4).



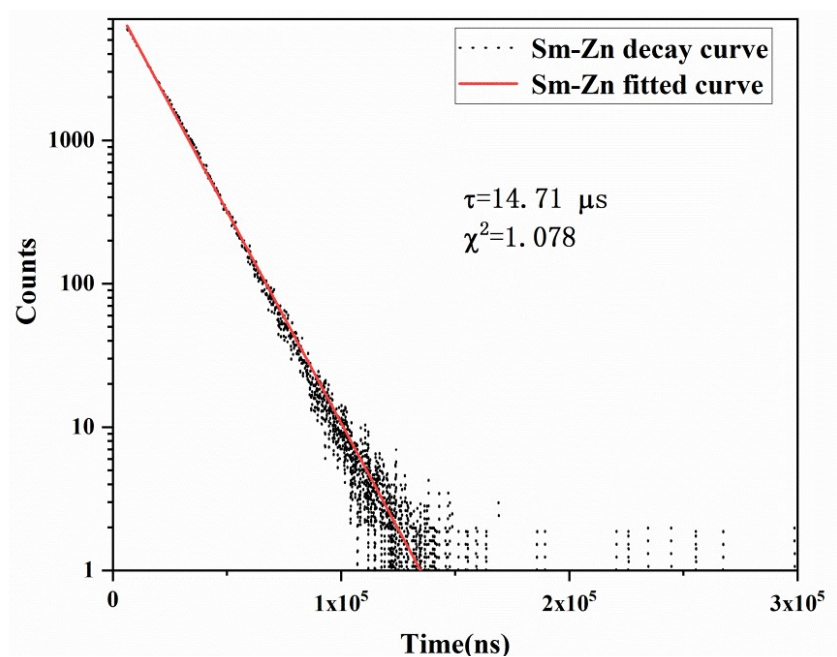

**Figure S40.** Excited state decay curve (black dots) with mono exponential fit (red line) of **3a-(Sm, Zn)**. ( $1.0 \times 10^{-5}$  M in MeCN;  $\lambda_{\text{ex}} = 386$  nm,  $\lambda_{\text{em}} = 645$  nm; lifetime = 14.71  $\mu\text{s}$ ).

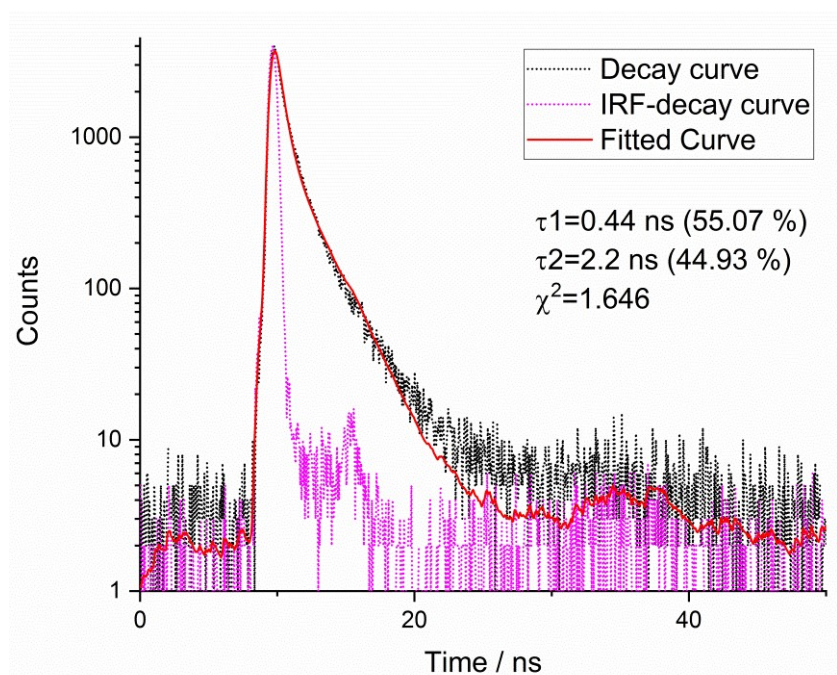

**Figure S41.** Luminescent lifetime of organic backbone of **3a-(Sm, Zn)** measured at 456 nm ( $1.0 \times 10^{-5}$  M in MeCN; lifetime = 1.26 ns).

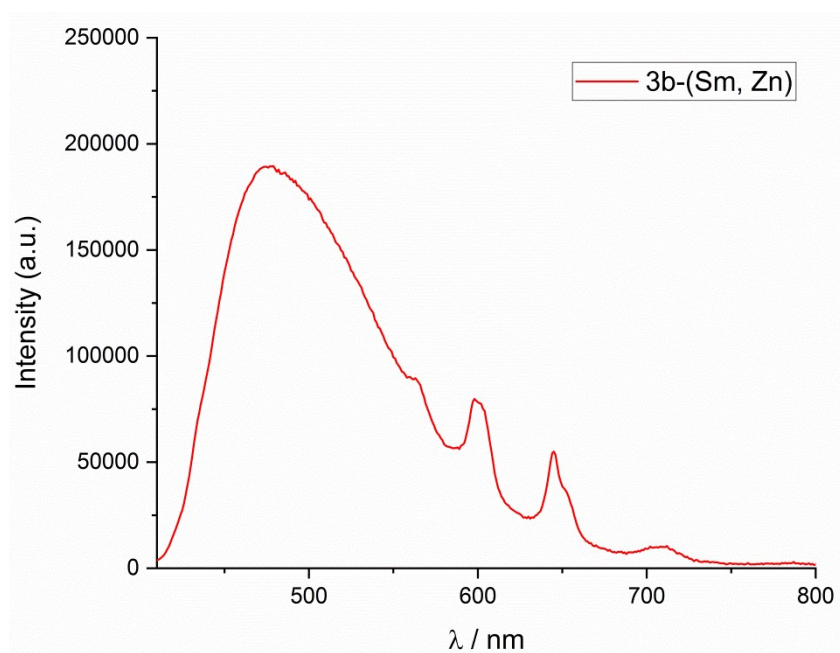

**Figure S42.** Emission (for the visible region only) of **3b-(Sm, Zn)**. ( $1.0 \times 10^{-5}$  M in MeCN;  $\lambda_{\text{ex}} = 386$  nm,  $\lambda_{\text{em}} = 645$  nm, slits = 4-4).

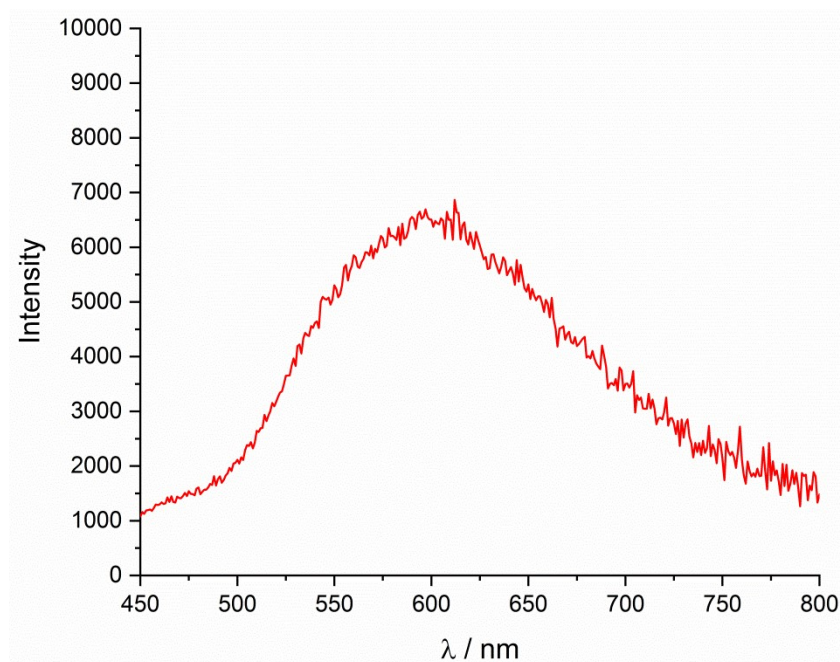

**Figure S43.** Emission (for the visible region only) of **3c-(Sm, Zn)**. ( $1.0 \times 10^{-5}$  M in MeCN;  $\lambda_{\text{ex}} = 386$  nm,  $\lambda_{\text{em}} = 645$  nm).

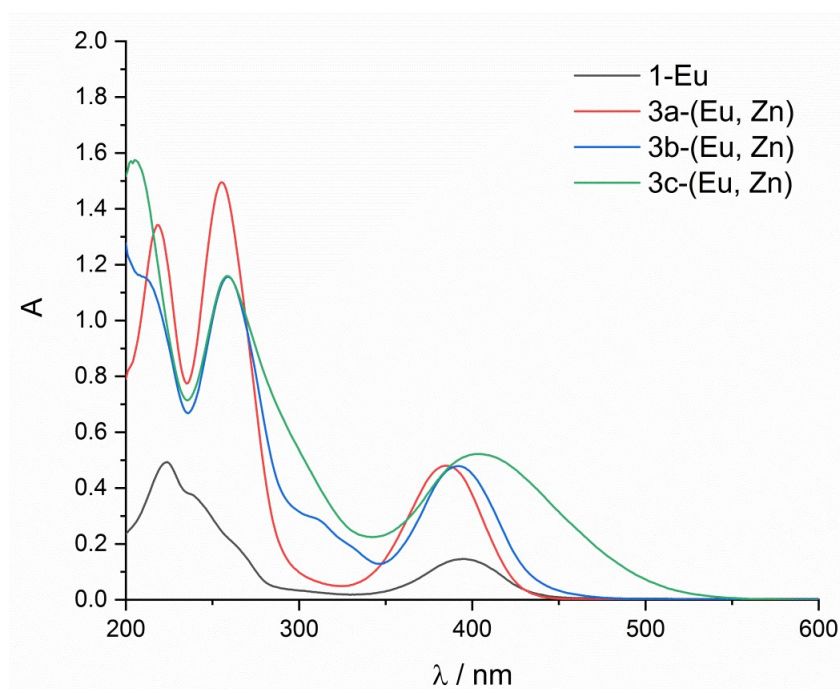

**Figure S44.** UV-Vis absorption spectra of **1-Eu**, ( $1.0 \times 10^{-5}$  M in MeCN), **3a-(Eu, Zn)** ( $1.0 \times 10^{-5}$  M in MeCN), **3b-(Eu, Zn)** ( $1.0 \times 10^{-5}$  M in MeCN), **3c-(Eu, Zn)** ( $1.0 \times 10^{-5}$  M in MeCN) at 298 K.

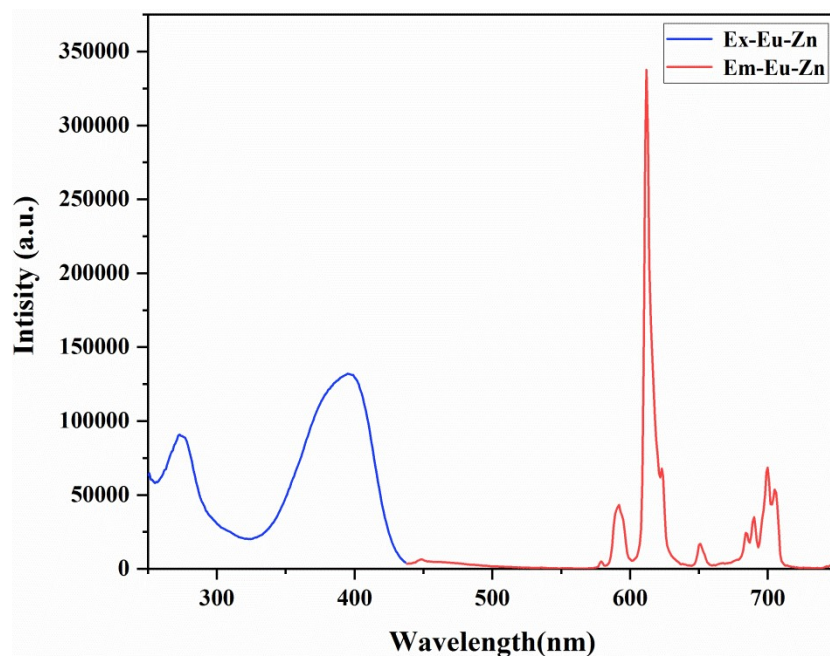

**Figure S45.** Excitation (blue line) and emission (red line) of **3a-(Eu, Zn)**. ( $1.0 \times 10^{-5}$  M in MeCN;  $\lambda_{\text{ex}} = 393$  nm,  $\lambda_{\text{em}} = 612$  nm).

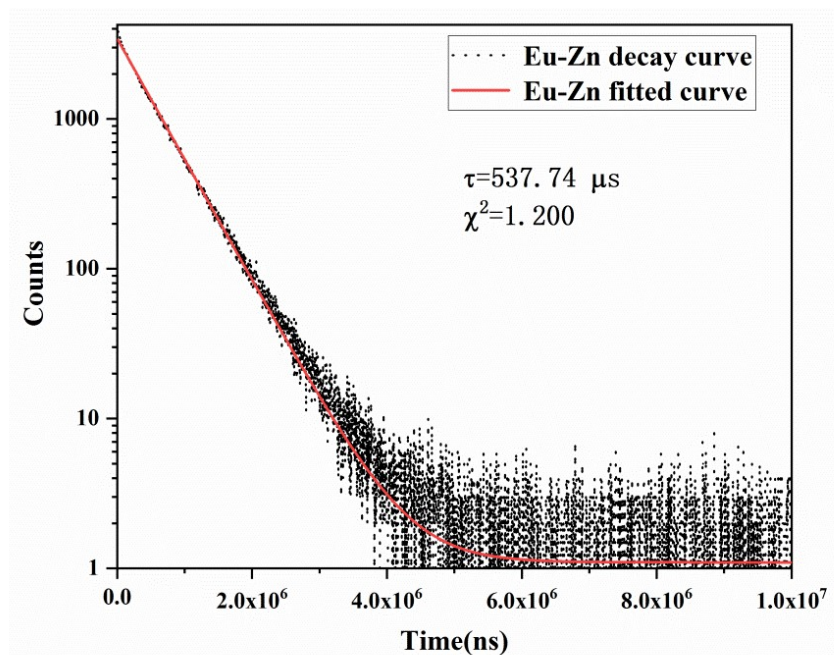

**Figure S46.** Excited state decay curve (black dots) with mono exponential fit (red line) of **3a-(Eu, Zn)**. ( $1.0 \times 10^{-5}$  M in MeCN;  $\lambda_{\text{ex}} = 393$  nm,  $\lambda_{\text{em}} = 612$  nm; lifetime = 14.71  $\mu\text{s}$ ).

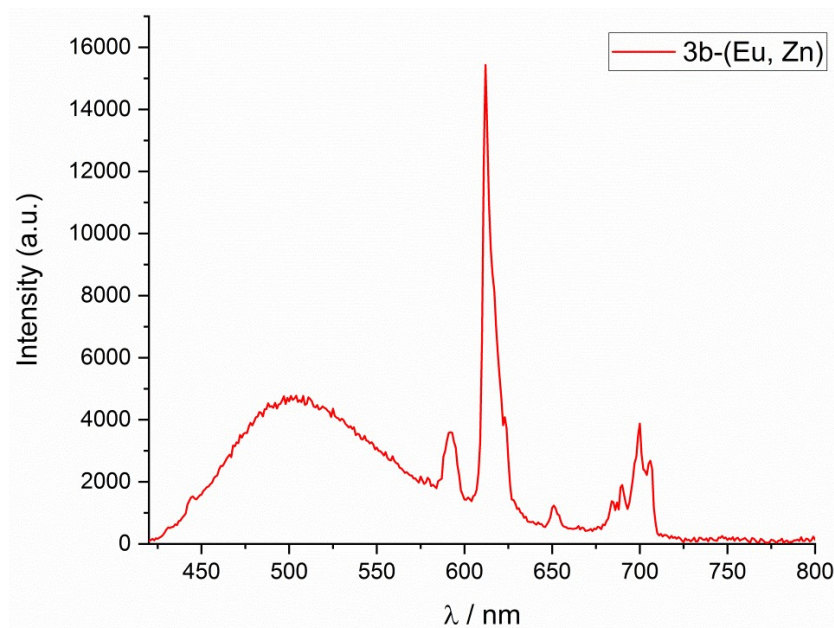

**Figure S47.** Emission spectrum of **3b-(Eu, Zn)**. ( $1.0 \times 10^{-5}$  M in MeCN;  $\lambda_{\text{ex}} = 393$  nm,  $\lambda_{\text{em}} = 612$  nm, slits = 2-2).

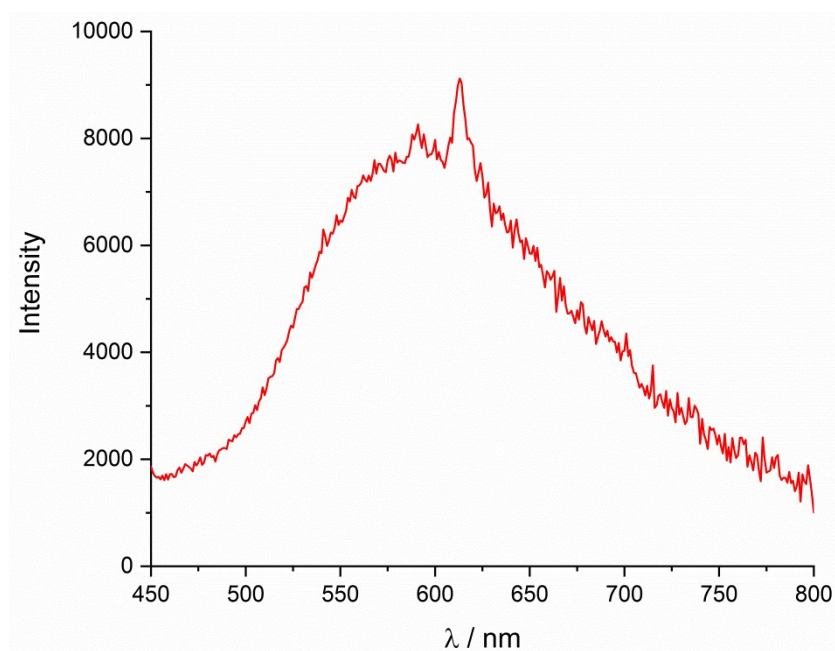

**Figure S48.** Emission spectrum of **3c-(Eu, Zn)**. ( $1.0 \times 10^{-5}$  M in MeCN;  $\lambda_{\text{ex}} = 393$  nm,  $\lambda_{\text{em}} = 612$  nm).

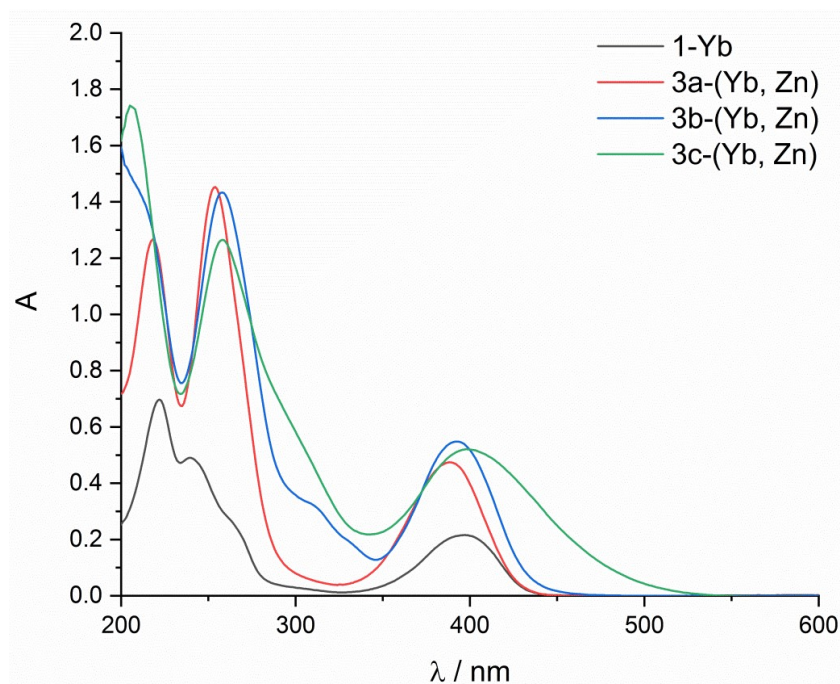

**Figure S49.** UV-Vis absorption spectra of **1-Yb** ( $1.0 \times 10^{-5}$  M in MeCN), **3a-(Yb, Zn)** ( $1.0 \times 10^{-5}$  M in MeCN), **3b-(Yb, Zn)** ( $1.0 \times 10^{-5}$  M in MeCN), **3c-(Yb, Zn)** ( $1.0 \times 10^{-5}$  M in MeCN) at 298 K.

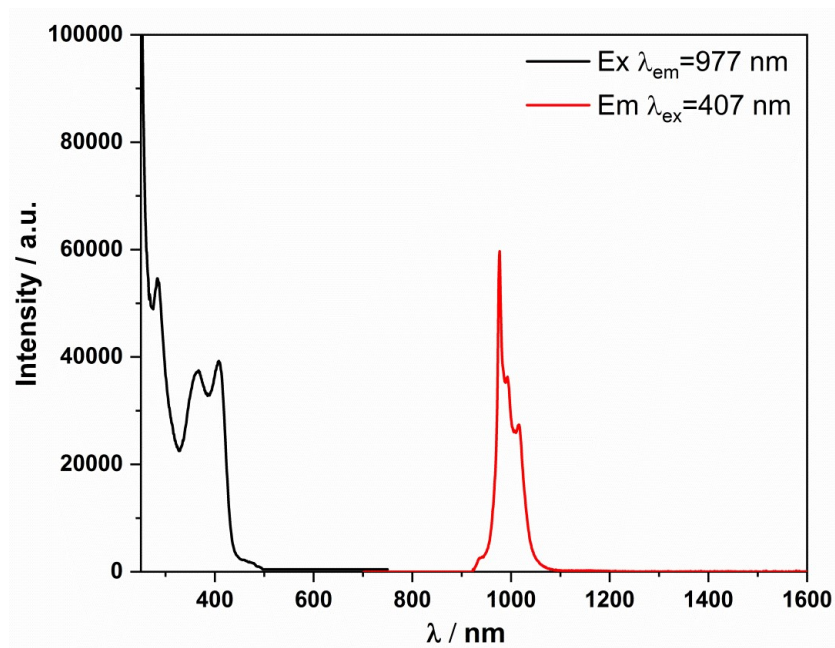

**Figure S50.** Excitation (black line) and emission (red line) spectra of **3a-(Yb, Zn)**.  
( $1.0 \times 10^{-5}$  M in MeCN;  $\lambda_{\text{ex}} = 408$  nm,  $\lambda_{\text{em}} = 977$  nm).

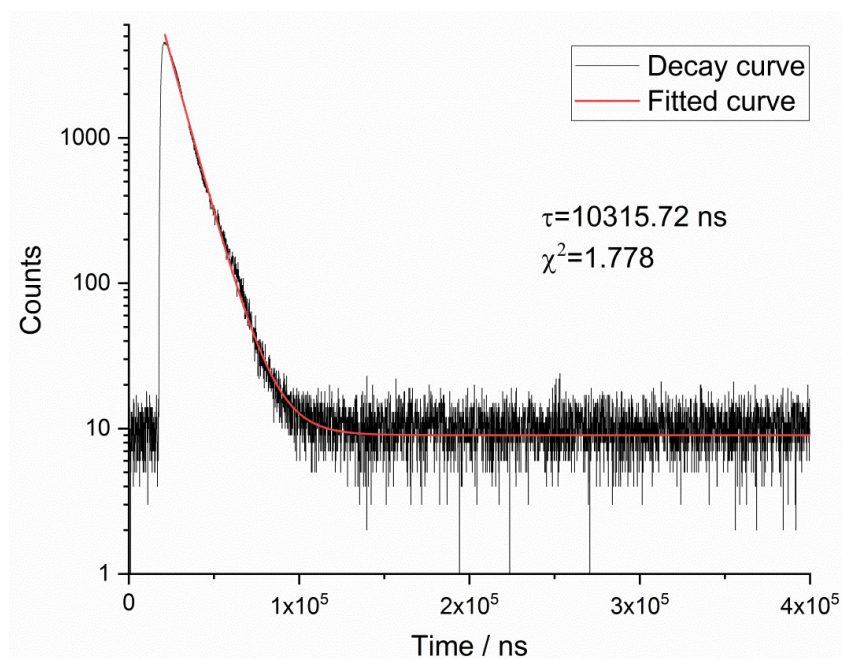

**Figure S51.** Excited state decay curve (black dots) with mono exponential fit (red line) of **3a-(Yb, Zn)**. ( $1.0 \times 10^{-5}$  M in MeCN;  $\lambda_{\text{ex}} = 408$  nm,  $\lambda_{\text{em}} = 977$  nm; lifetime = 10.32  $\mu\text{s}$ ).

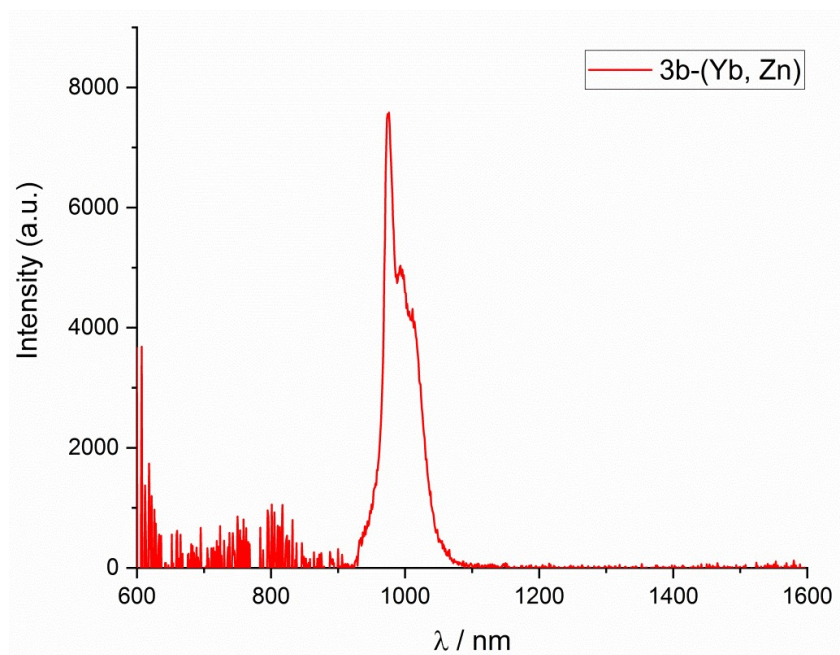

**Figure S52.** Emission spectrum of **3b-(Yb, Zn)**. ( $1.0 \times 10^{-5}$  M in MeCN;  $\lambda_{\text{ex}} = 408$  nm,  $\lambda_{\text{em}} = 977$  nm).

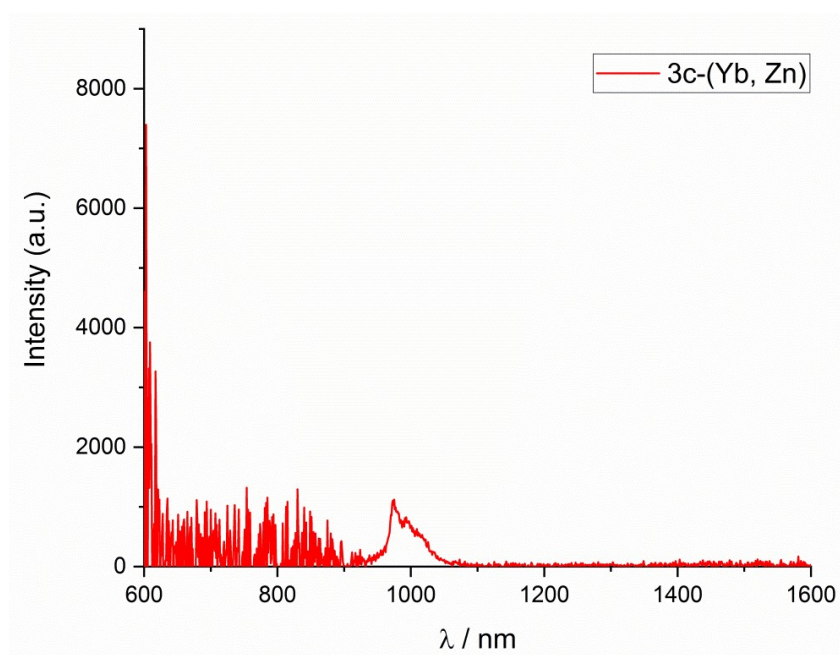

**Figure S53.** Emission spectrum of **3c-(Yb, Zn)**. ( $1.0 \times 10^{-5}$  M in MeCN;  $\lambda_{\text{ex}} = 408$  nm,  $\lambda_{\text{em}} = 977$  nm).

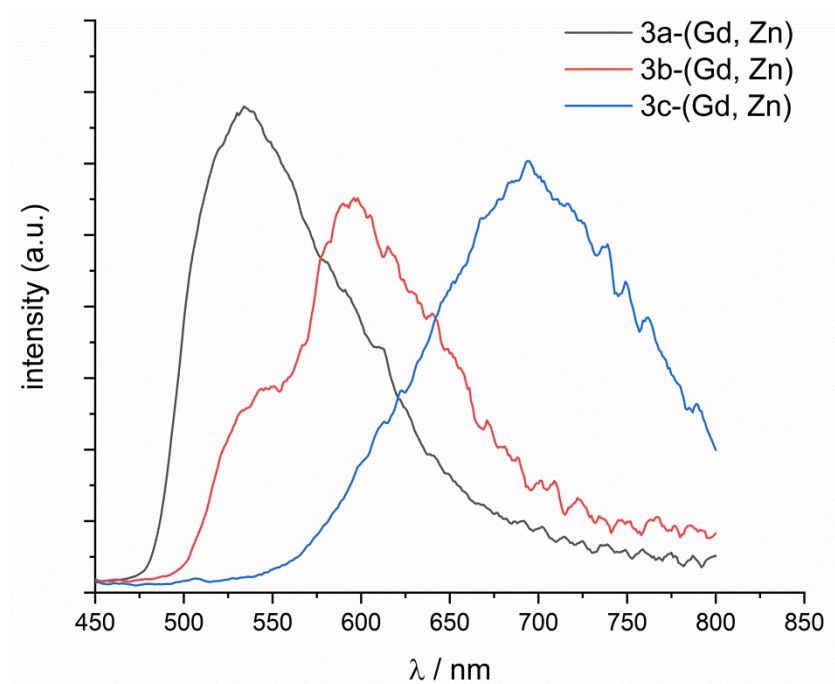

**Figure S54.** Phosphorescence emission of complexes **3a-3c-(Gd, Zn)** in MeCN at 77 K ( $\lambda_{\text{ex}}=390$  nm for **3a-3b-(Gd, Zn)**,  $\lambda_{\text{ex}}=414$  nm for **3c-(Gd, Zn)**,  $c=1.0 \times 10^{-4}$  M,  $\text{N}_2$ , gating = 0.02-10 ms).

## 5. Magnetic Data

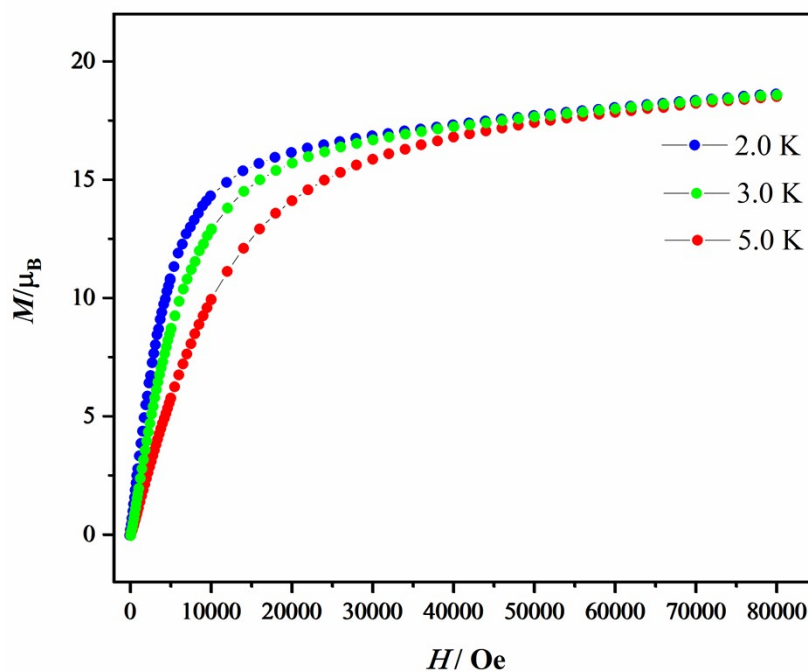

**Figure S55.** Field-dependent magnetization of **3a<sup>2</sup>-(Dy, Co)** in the temperature range of 2, 3 and 5 K.



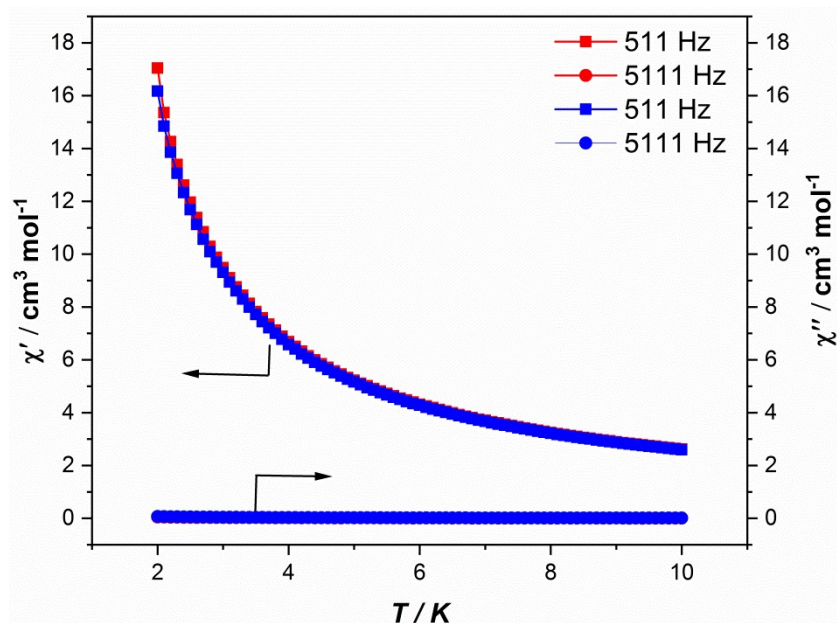

**Figure S56.** Temperature-dependent in-phase ( $\chi'$ ) and out-of-phase ( $\chi''$ ) of **3a'-(Dy, Co)** at indicated frequencies under zero dc field.

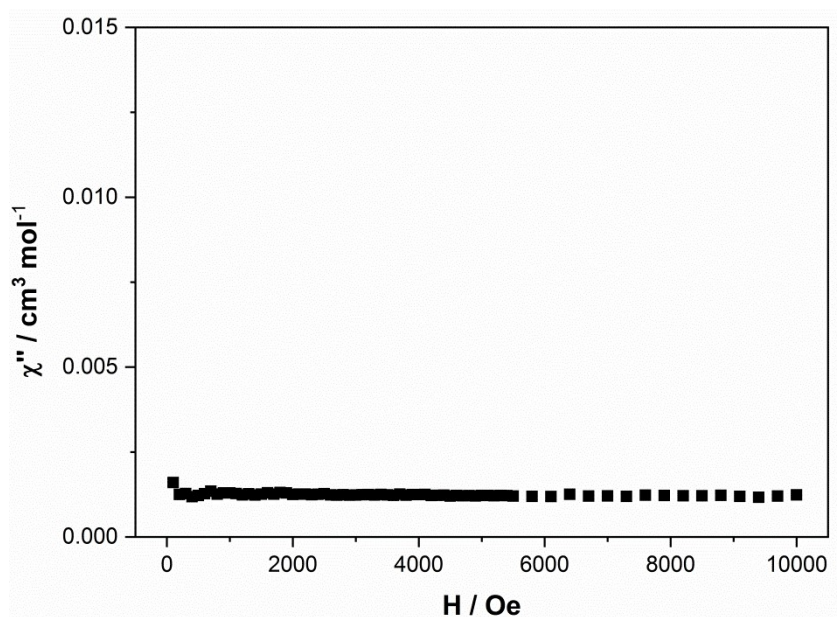

**Figure S57.** Field dependent  $\chi''$  data of **3a'-(Dy, Co)** in the applied dc field of 0–10000 Oe at 2 K and 1000 Hz.

## 6. Single crystal X-ray diffraction studies

The X-ray diffraction studies for heterometal-organic macrocycles were carried out on Bruker D8 VENTURE photon II diffractometer with I $\mu$ s 3.0 microfocus X-ray source using APEX III program. Data reduction was performed with the saint and SADABS package. The structures were solved by direct methods using SHELXS-97

---

and refined by full-matrix least-squares on  $F^2$  using SHELXL-2016 program.<sup>3</sup> Solvent molecules were highly disordered and could not be reasonably located. These residual intensities were removed by PLATON/SQUEEZE routine<sup>4</sup>. Crystallographic data and other pertinent information for **3a-(Lu, Zn)**, **3b-(Lu, Zn)**, **3c-(Lu, Zn)** and **3a'-(Dy, Co)**, were summarized in Table S1 and Table S2. In **3a-(Lu, Zn)**, some constraints (SIMU, DFIX and SADI) were applied to the free OTf anions to obtain the chemical-reasonable models and reasonable atomic displacement parameters. In **3b-(Lu, Zn)**, some constraints (SIMU, DFIX, SADI, ISOR and DELU) were applied to the free OTf anions to obtain the chemical-reasonable models and reasonable atomic displacement parameters. In **3c-(Lu, Zn)**, some constraints (SIMU, EADP and DELU) were applied to obtain the chemical-reasonable models and reasonable atomic displacement parameters. In **3a'-(Dy, Co)**, some constraints (SIMU, DFIX and DELU) were applied to obtain the chemical-reasonable models and reasonable atomic displacement parameters. The CCDC numbers: 2256435 for **3a-(Lu, Zn)**, 2256436 for **3b-(Lu, Zn)**, 2256437 for **3b-(Lu, Zn)** and 2256438 for **3a'-(Dy, Co)**.

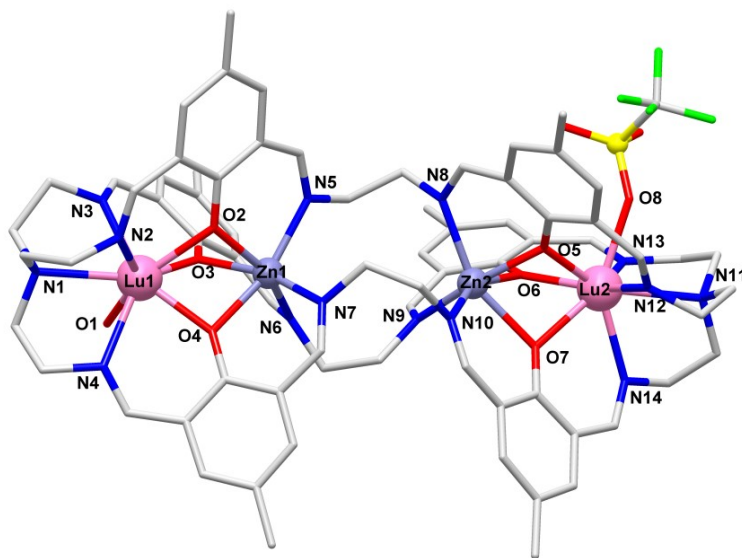

**Figure S58.** The coordination environment of Lu and Zn in **3a-(Lu, Zn)**.

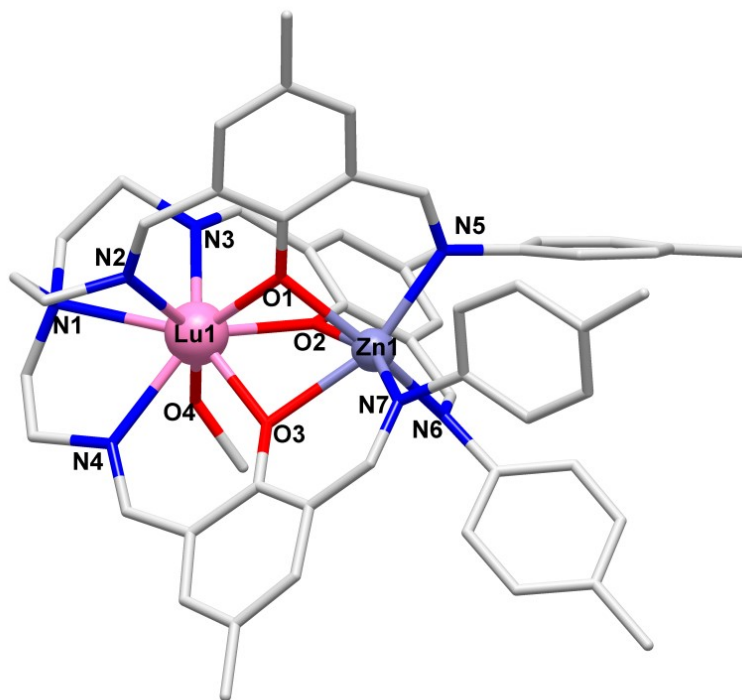

**Figure S59.** The coordination environment of Lu and Zn in **3b-(Lu, Zn)**.

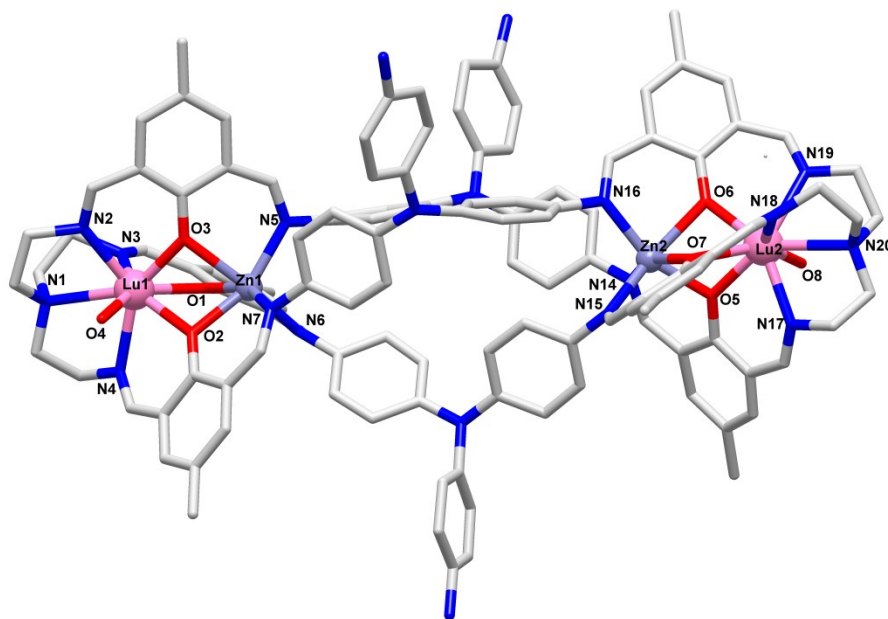

**Figure S60.** The coordination environment of Lu and Zn in **3c-(Lu, Zn)**.

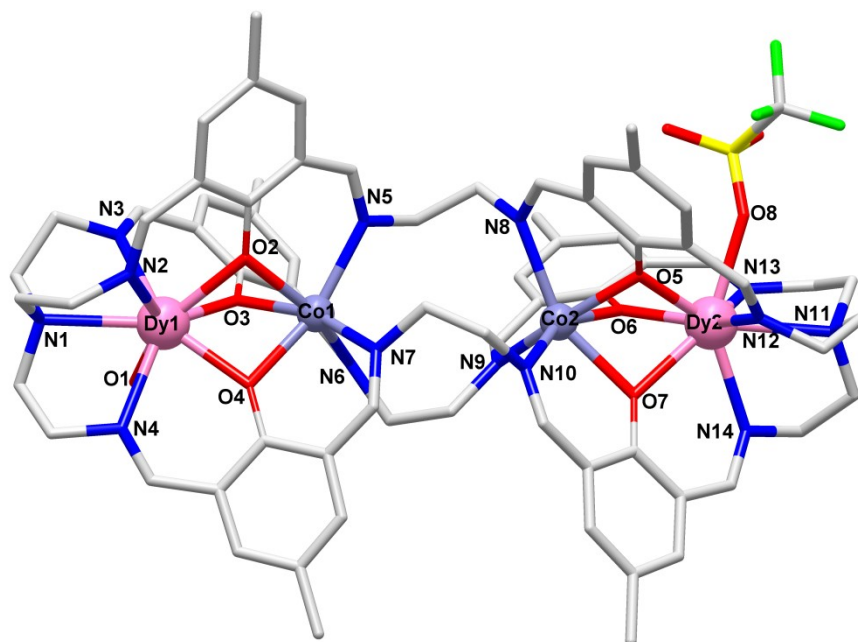

**Figure S61.** The coordination environment of Dy and Co in **3a'**-(Dy, Co).

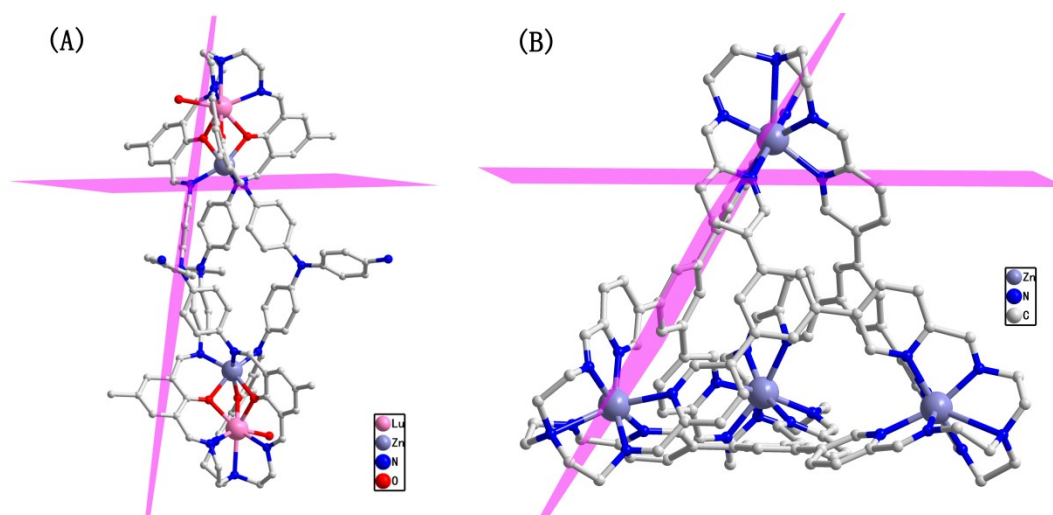

**Figure S62.** The dihedral angle generated by the plane of three coordinated nitrogen atom closest to panel backbone and one benzene ring plane for **3c**-(Lu, Zn) (A) and reported  $Zn_4$  tetrahedron (B).

Table S1. Crystal data and structure refinement for **3a-(Lu, Zn)** and **3b-(Lu, Zn)**

| Identification code               | <b>3a-(Lu, Zn)</b>                                                                                                            | <b>3b-(Lu, Zn)</b>                                                                                                               |
|-----------------------------------|-------------------------------------------------------------------------------------------------------------------------------|----------------------------------------------------------------------------------------------------------------------------------|
| Empirical formula                 | C <sub>76</sub> H <sub>86</sub> F <sub>9</sub> Lu <sub>2</sub> N <sub>14</sub> O <sub>18</sub> S <sub>3</sub> Zn <sub>2</sub> | C <sub>111</sub> H <sub>104</sub> F <sub>12</sub> Lu <sub>2</sub> N <sub>14</sub> O <sub>20</sub> S <sub>4</sub> Zn <sub>2</sub> |
| Formula weight                    | 2231.44                                                                                                                       | 2791.00                                                                                                                          |
| Temperature                       | 150(2) K                                                                                                                      | 159.98 K                                                                                                                         |
| Wavelength                        | 0.71073 Å                                                                                                                     | 0.71073 Å                                                                                                                        |
| Crystal system                    | Monoclinic                                                                                                                    | Monoclinic                                                                                                                       |
| Space group                       | C2/c                                                                                                                          | C2/c                                                                                                                             |
| a/Å                               | 36.125(3)                                                                                                                     | 20.602(2)                                                                                                                        |
| b/Å                               | 25.6979(18)                                                                                                                   | 26.315(2)                                                                                                                        |
| c/Å                               | 26.505(4)                                                                                                                     | 28.155(2)                                                                                                                        |
| $\alpha$ /°                       | 90                                                                                                                            | 90                                                                                                                               |
| $\beta$ /°                        | 122.641(2)                                                                                                                    | 93.285(4)                                                                                                                        |
| $\gamma$ /°                       | 90                                                                                                                            | 90                                                                                                                               |
| Volume                            | 20719(4) Å <sup>3</sup>                                                                                                       | 15239(2) Å <sup>3</sup>                                                                                                          |
| Z                                 | 8                                                                                                                             | 4                                                                                                                                |
| Density (calculated)              | 1.431 Mg/m <sup>3</sup>                                                                                                       | 1.217 Mg/m <sup>3</sup>                                                                                                          |
| Absorption coefficient            | 2.485 mm <sup>-1</sup>                                                                                                        | 1.720 mm <sup>-1</sup>                                                                                                           |
| F(000)                            | 8920                                                                                                                          | 5608                                                                                                                             |
| Crystal size                      | 0.15 x 0.11 x 0.06 mm <sup>3</sup>                                                                                            | 0.25 x 0.12 x 0.1 mm <sup>3</sup>                                                                                                |
| Theta range for data collection   | 2.236 to 25.027°.                                                                                                             | 2.611 to 22.002°.                                                                                                                |
| Index ranges                      | -42<=h<=42, -30<=k<=30, -<br>29<=l<=31                                                                                        | -20<=h<=21, -27<=k<=27, -<br>29<=l<=29                                                                                           |
| Reflections collected             | 144292                                                                                                                        | 47081                                                                                                                            |
| Independent reflections           | 18264 [R(int) = 0.0751]                                                                                                       | 9273 [R(int) = 0.0866]                                                                                                           |
| Refinement method                 | Full-matrix least-squares on F <sup>2</sup>                                                                                   | Full-matrix least-squares on F <sup>2</sup>                                                                                      |
| Data / restraints / parameters    | 18264 / 298 / 1180                                                                                                            | 9273 / 787 / 826                                                                                                                 |
| Goodness-of-fit on F <sup>2</sup> | 1.040                                                                                                                         | 1.022                                                                                                                            |
| Final R indices [I>2sigma(I)]     | R1 = 0.0473, wR2 = 0.1188                                                                                                     | R1 = 0.0815, wR2 = 0.2040                                                                                                        |
| R indices (all data)              | R1 = 0.0729, wR2 = 0.1393                                                                                                     | R1 = 0.1151, wR2 = 0.2315                                                                                                        |
| Extinction coefficient            | n/a                                                                                                                           | n/a                                                                                                                              |
| Largest diff. peak and hole       | 2.329 and -1.514 e.Å <sup>-3</sup>                                                                                            | 1.426 and -0.966 e.Å <sup>-3</sup>                                                                                               |

Table S2. Crystal data and structure refinement for **3c-(Lu, Zn)** and **3a'-(Dy, Co)**

| Identification code                | <b>3c-(Lu, Zn)</b>                                                                                                              | <b>3a'-(Dy, Co)</b>                                                                                                           |
|------------------------------------|---------------------------------------------------------------------------------------------------------------------------------|-------------------------------------------------------------------------------------------------------------------------------|
| Empirical formula                  | C <sub>128</sub> H <sub>126</sub> F <sub>9</sub> Lu <sub>2</sub> N <sub>20</sub> O <sub>20</sub> S <sub>3</sub> Zn <sub>2</sub> | C <sub>77</sub> H <sub>83</sub> F <sub>9</sub> Dy <sub>2</sub> N <sub>15</sub> O <sub>16</sub> S <sub>3</sub> Co <sub>2</sub> |
| Formula weight                     | 3012.34                                                                                                                         | 2184.62                                                                                                                       |
| Temperature                        | 170(2) K                                                                                                                        | 150(2) K                                                                                                                      |
| Wavelength                         | 0.71073 Å                                                                                                                       | 0.71073 Å                                                                                                                     |
| Crystal system                     | Triclinic                                                                                                                       | Monoclinic                                                                                                                    |
| Space group                        | P-1                                                                                                                             | C2/c                                                                                                                          |
| a/Å                                | 16.624(3)                                                                                                                       | 35.900(4)                                                                                                                     |
| b/Å                                | 21.239(3)                                                                                                                       | 25.827(3)                                                                                                                     |
| c/Å                                | 25.607(4)                                                                                                                       | 26.793(5)                                                                                                                     |
| $\alpha$ /°                        | 79.242(3)                                                                                                                       | 90                                                                                                                            |
| $\beta$ /°                         | 81.468(4)                                                                                                                       | 123.682(3)                                                                                                                    |
| $\gamma$ /°                        | 70.737(4)                                                                                                                       | 90                                                                                                                            |
| Volume                             | 8348(2) Å <sup>3</sup>                                                                                                          | 20671(5) Å <sup>3</sup>                                                                                                       |
| Z                                  | 2                                                                                                                               | 8                                                                                                                             |
| Density (calculated)               | 1.198 Mg/m <sup>3</sup>                                                                                                         | 1.404 Mg/m <sup>3</sup>                                                                                                       |
| Absorption coefficient             | 1.561 mm <sup>-1</sup>                                                                                                          | 1.882 mm <sup>-1</sup>                                                                                                        |
| F(000)                             | 3050                                                                                                                            | 8744                                                                                                                          |
| Crystal size                       | 0.03 x 0.02 x 0.01 mm <sup>3</sup>                                                                                              | 0.13 x 0.09 x 0.05 mm <sup>3</sup>                                                                                            |
| Theta range for data collection    | 2.318 to 19.782°.                                                                                                               | 2.218 to 20.866°.                                                                                                             |
| Index ranges                       | -15<=h<=15, -20<=k<=20, -<br>24<=l<=24                                                                                          | -35<=h<=35, -25<=k<=25, -<br>26<=l<=26                                                                                        |
| Reflections collected              | 54390                                                                                                                           | 99570                                                                                                                         |
| Independent reflections            | 14647 [R(int) = 0.1917]                                                                                                         | 10829 [R(int) = 0.0531]                                                                                                       |
| Refinement method                  | Full-matrix least-squares on F <sup>2</sup>                                                                                     | Full-matrix least-squares on F <sup>2</sup>                                                                                   |
| Data / restraints / parameters     | 14647 / 5310 / 1575                                                                                                             | 10829 / 266 / 1152                                                                                                            |
| Goodness-of-fit on F <sup>2</sup>  | 0.937                                                                                                                           | 1.075                                                                                                                         |
| Final R indices [I>2 $\sigma$ (I)] | R1 = 0.0673, wR2 = 0.1491                                                                                                       | R1 = 0.0498, wR2 = 0.1282                                                                                                     |
| R indices (all data)               | R1 = 0.1293, wR2 = 0.1778                                                                                                       | R1 = 0.0644, wR2 = 0.1443                                                                                                     |
| Extinction coefficient             | n/a                                                                                                                             | n/a                                                                                                                           |
| Largest diff. peak and hole        | 0.786 and -0.994 e.Å <sup>-3</sup>                                                                                              | 2.422 and -1.617 e.Å <sup>-3</sup>                                                                                            |

Table S3. Selected bond distances (Å) and angles (°) for **3a-(Lu, Zn)**

|            |            |            |            |
|------------|------------|------------|------------|
| Zn1-O3     | 2.067(5)   | Zn2-O5     | 2.037(5)   |
| Zn1-N7     | 2.075(5)   | Zn2-N9     | 2.082(6)   |
| Zn1-N5     | 2.113(5)   | Zn2-N10    | 2.164(5)   |
| Zn1-O2     | 2.151(4)   | Zn2-O7     | 2.191(4)   |
| Zn1-O4     | 2.167(4)   | Zn2-N8     | 2.221(5)   |
| Zn1-N6     | 2.196(6)   | Zn2-O6     | 2.255(4)   |
| Zn1-Lu1    | 3.2057(9)  | Zn2-Lu2    | 3.2482(9)  |
| Lu1-O3     | 2.217(4)   | Lu2-O6     | 2.221(5)   |
| Lu1-O4     | 2.237(4)   | Lu2-O5     | 2.244(5)   |
| Lu1-O2     | 2.329(5)   | Lu2-O7     | 2.305(5)   |
| Lu1-O1     | 2.331(5)   | Lu2-O8     | 2.322(5)   |
| Lu1-N2     | 2.383(6)   | Lu2-N12    | 2.385(7)   |
| Lu1-N3     | 2.423(6)   | Lu2-N14    | 2.421(6)   |
| Lu1-N4     | 2.507(7)   | Lu2-N13    | 2.476(6)   |
| Lu1-N1     | 2.601(7)   | Lu2-N11    | 2.563(6)   |
| O3-Zn1-O2  | 73.18(18)  | O5-Zn2-O7  | 73.24(18)  |
| O3-Zn1-O4  | 78.03(18)  | O5-Zn2-O6  | 75.52(18)  |
| O2-Zn1-O4  | 73.33(16)  | O7-Zn2-O6  | 71.69(17)  |
| O3-Zn1-N6  | 81.3(2)    | O5-Zn2-N8  | 82.5(2)    |
| N5-Zn1-O2  | 86.61(18)  | N9-Zn2-O6  | 81.84(19)  |
| N7-Zn1-O4  | 84.55(18)  | O7-Zn2-N10 | 84.88(19)  |
| O3-Lu1-O4  | 73.53(16)  | O6-Lu2-O5  | 72.30(17)  |
| O3-Lu1-O2  | 67.12(17)  | O6-Lu2-O7  | 70.23(17)  |
| O4-Lu1-O2  | 68.72(15)  | O5-Lu2-O7  | 67.42(16)  |
| O2-Lu1-N2  | 70.32(17)  | O5-Lu2-N12 | 74.53(19)  |
| O3-Lu1-N3  | 73.72(18)  | O7-Lu2-N14 | 70.82(18)  |
| O4-Lu1-N4  | 74.09(17)  | O6-Lu2-N13 | 74.52(18)  |
| Zn1-O2-Lu1 | 91.29(17)  | Zn2-O5-Lu2 | 98.6(2)    |
| Zn1-O3-Lu1 | 96.81(18)  | Lu2-O6-Zn2 | 93.07(18)  |
| Zn1-O4-Lu1 | 93.41(16)  | Zn2-O7-Lu2 | 92.47(17)  |
| N5-Zn1-O4  | 159.84(19) | O5-Zn2-N9  | 157.3(2)   |
| O2-Zn1-N6  | 154.3(2)   | N10-Zn2-O6 | 156.57(19) |
| O3-Zn1-N7  | 162.44(19) | O7-Zn2-N8  | 155.45(19) |

Table S4. Selected bond distances (Å) and angles (°) for **3b-(Lu, Zn)**

|         |            |        |           |
|---------|------------|--------|-----------|
| Zn1-O2  | 2.074(8)   | Lu1-N4 | 2.464(12) |
| Zn1-N7  | 2.086(11)  | Lu1-O2 | 2.253(8)  |
| Zn1-O1  | 2.154(7)   | Lu1-O1 | 2.284(8)  |
| Zn1-N5  | 2.153(9)   | Lu1-O4 | 2.377(9)  |
| Zn1-N6  | 2.154(9)   | Lu1-N1 | 2.642(12) |
| Zn1-O3  | 2.285(8)   | Lu1-N2 | 2.412(10) |
| Zn1-Lu1 | 3.2408(13) | Lu1-N3 | 2.400(15) |

---

|           |          |            |         |
|-----------|----------|------------|---------|
| Lu1-O3    | 2.239(8) | Lu1-O3-Zn1 | 91.5(3) |
| O3-Lu1-O2 | 73.4(3)  | O2-Zn1-O1  | 72.7(3) |
| O3-Lu1-O1 | 71.6(3)  | O2-Zn1-O3  | 75.9(3) |
| O2-Lu1-O1 | 67.1(3)  | O1-Zn1-O3  | 73.1(3) |
| O2-Lu1-N3 | 72.9(4)  | O1-Zn1-N5  | 85.3(3) |
| O1-Lu1-N2 | 71.1(3)  | O2-Zn1-N6  | 83.1(3) |
| O3-Lu1-N4 | 74.7(3)  | N7-Zn1-O3  | 83.6(4) |
| N5-Zn1-O3 | 158.3(3) | Zn1-O1-Lu1 | 93.8(3) |
| O2-Zn1-N7 | 159.5(4) | Zn1-O2-Lu1 | 96.9(4) |
| N6-Zn1-O1 | 155.8(3) |            |         |

---

Table S5. Selected bond distances for **3c-(Lu, Zn)**

---

|            |            |            |           |
|------------|------------|------------|-----------|
| Lu1-O3     | 2.225(8)   | Lu2-O6     | 2.210(10) |
| Lu1-O2     | 2.224(10)  | Lu2-O5     | 2.242(10) |
| Lu1-O1     | 2.309(10)  | Lu2-O7     | 2.342(12) |
| Lu1-O4     | 2.319(9)   | Lu2-N17    | 2.402(15) |
| Lu1-N3     | 2.386(13)  | Lu2-N18    | 2.416(17) |
| Lu1-N2     | 2.402(12)  | Lu2-O8     | 2.380(13) |
| Lu1-N4     | 2.410(11)  | Lu2-N19    | 2.471(13) |
| Lu1-N1     | 2.595(12)  | Lu2-N20    | 2.581(14) |
| Lu1-Zn1    | 3.2572(18) | Lu2-Zn2    | 3.248(2)  |
| Zn1-O2     | 2.055(9)   | Zn2-O5     | 2.061(11) |
| Zn1-N5     | 2.100(11)  | Zn2-N16    | 2.084(13) |
| Zn1-N6     | 2.141(14)  | Zn2-O7     | 2.120(11) |
| Zn1-N7     | 2.156(11)  | Zn2-N15    | 2.147(13) |
| Zn1-O1     | 2.155(10)  | Zn2-N14    | 2.158(14) |
| Zn1-O3     | 2.286(10)  | Zn2-O6     | 2.281(9)  |
| O3-Lu1-O2  | 72.8(3)    | O6-Lu2-O5  | 73.3(4)   |
| O3-Lu1-O1  | 70.6(3)    | O6-Lu2-O7  | 70.8(4)   |
| O2-Lu1-O1  | 66.4(3)    | O5-Lu2-O7  | 65.4(4)   |
| O3-Lu1-N2  | 76.0(4)    | O5-Lu2-N27 | 73.9(4)   |
| O1-Lu1-N3  | 70.9(4)    | O7-Lu2-N18 | 71.0(4)   |
| O2-Lu1-O4  | 74.5(4)    | O6-Lu2-N19 | 76.0(4)   |
| O2-Zn1-O3  | 74.7(4)    | O5-Zn2-O6  | 75.3(4)   |
| O2-Zn1-O1  | 71.9(4)    | O7-Zn2-O6  | 73.6(4)   |
| O1-Zn1-O3  | 72.6(4)    | O5-Zn2-O7  | 72.7(5)   |
| N6-Zn1-O1  | 84.4(4)    | O5-Zn2-N14 | 82.1(5)   |
| N5-Zn1-O3  | 83.8(4)    | N16-Zn2-O6 | 83.0(4)   |
| O2-Zn1-N7  | 84.3(4)    | O7-Zn2-N15 | 85.5(5)   |
| Zn1-O1-Lu1 | 93.7(4)    | Zn2-O5-Lu2 | 97.9(5)   |
| Zn1-O2-Lu1 | 99.1(4)    | Lu2-O6-Zn2 | 92.6(4)   |
| Lu1-O3-Zn1 | 92.4(3)    | Zn2-O7-Lu2 | 93.3(5)   |

---



Table S6. Selected bond distances for **3a'-(Dy, Co)**

|            |            |            |            |
|------------|------------|------------|------------|
| Co1-O3     | 2.131(7)   | Co2-O5     | 2.116(6)   |
| Co1-O2     | 2.189(6)   | Co2-O6     | 2.268(6)   |
| Co1-N7     | 2.195(7)   | Co2-O7     | 2.220(6)   |
| Co1-O4     | 2.207(5)   | Co2-N8     | 2.321(7)   |
| Co1-N5     | 2.210(7)   | Co2-N9     | 2.188(8)   |
| Co1-N6     | 2.293(7)   | Co2-N10    | 2.247(7)   |
| Co1-Dy1    | 3.2365(15) | Co2-Dy2    | 3.2727(15) |
| Dy1-O3     | 2.263(6)   | Dy2-O5     | 2.277(6)   |
| Dy1-O4     | 2.292(6)   | Dy2-O6     | 2.286(7)   |
| Dy1-O2     | 2.374(6)   | Dy2-O7     | 2.345(6)   |
| Dy1-O1     | 2.417(7)   | Dy2-O8     | 2.384(6)   |
| Dy1-N2     | 2.428(8)   | Dy2-N11    | 2.598(8)   |
| Dy1-N3     | 2.470(7)   | Dy2-N12    | 2.432(8)   |
| Dy1-N4     | 2.507(7)   | Dy2-N13    | 2.509(7)   |
| Dy1-N1     | 2.601(7)   | Dy2-N14    | 2.449(8)   |
| O3-Co1-O2  | 73.4(2)    | O5-Co2-O6  | 77.2(2)    |
| O3-Co1-O4  | 79.7(2)    | O5-Co2-O7  | 73.9(2)    |
| O2-Co1-O4  | 74.9(2)    | O7-Co2-O6  | 73.3(2)    |
| O2-Co1-N5  | 83.5(2)    | O5-Co2-N8  | 79.7(3)    |
| O3-Co1-N6  | 78.0(3)    | N9-Co2-O6  | 79.9(2)    |
| N7-Co1-O4  | 82.1(2)    | O7-Co2-N10 | 82.2(2)    |
| O3-Dy1-O2  | 75.3(2)    | O5-Dy2-O6  | 73.7(2)    |
| O3-Dy1-O4  | 67.6(2)    | O5-Dy2-O7  | 68.7(2)    |
| O4-Dy1-O2  | 69.9(2)    | O6-Dy2-O7  | 70.7(2)    |
| O2-Dy1-N2  | 70.1(2)    | O5-Dy2-N12 | 73.7(2)    |
| O3-Dy1-N3  | 74.0(2)    | O7-Dy2-N14 | 70.7(2)    |
| O4-Dy1-N4  | 73.0(2)    | O6-Dy2-N13 | 73.5(2)    |
| Co1-O2-Dy1 | 90.3(2)    | Co2-O5-Dy2 | 96.2(2)    |
| Co1-O3-Dy1 | 94.8(2)    | Co2-O6-Dy2 | 91.9(2)    |
| Co1-O4-Dy1 | 92.0(2)    | Co2-O7-Dy2 | 91.6(2)    |

---

## 7. Continuous shape measurements analysis

A continuous shape measures (CShMs) analysis of Lu and Zn coordination polyhedra present in the asymmetric unit of **3a-3c-(Lu, Zn)** and Dy and Co coordination polyhedra present in the asymmetric unit of **3a'-(Dy, Co)** has been performed with the SHAPE 2.1 software considering an eight-coordination or six-coordination<sup>5</sup> (Table S7 and Table S8).

Table S7. Coordination geometries of Ln<sup>III</sup> evaluated by SHAPE 2.1 considering an eight-coordination.

| Abbreviation | Symmetry        | Ideal geometry                             |
|--------------|-----------------|--------------------------------------------|
| OP-8         | D <sub>8h</sub> | Octagon                                    |
| HPY-8        | C <sub>7v</sub> | Heptagonal pyramid                         |
| HBPY-8       | D <sub>6h</sub> | Hexagonal bipyramid                        |
| CU-8         | O <sub>h</sub>  | Cube                                       |
| SAPR-8       | D <sub>4d</sub> | Square antiprism                           |
| TDD-8        | D <sub>2d</sub> | Triangular dodecahedron                    |
| JGBF-8       | D <sub>2d</sub> | Johnson gyrobifastigium J26                |
| JETBPY-8     | D <sub>3h</sub> | Johnson elongated triangular bipyramid J14 |
| JBTPR-8      | C <sub>2v</sub> | Biaugmented trigonal prism J50             |
| BTPR-8       | C <sub>2v</sub> | Biaugmented trigonal prism                 |
| JSD-8        | D <sub>2d</sub> | Snub disphenoid                            |
| TT-8         | T <sub>d</sub>  | Triakis tetrahedron                        |
| ETBPY-8      | D <sub>3h</sub> | Elongated trigonal bipyramid               |

Table S8. Coordination geometries of Zn<sup>II</sup> or Co<sup>II</sup> evaluated by SHAPE 2.1 considering a six-coordination.

| Abbreviation | Symmetry        | Ideal geometry                |
|--------------|-----------------|-------------------------------|
| HP-6         | D <sub>6h</sub> | Hexagon                       |
| PPY-6        | C <sub>5v</sub> | Pentagonal pyramid            |
| OC-6         | O <sub>h</sub>  | Octahedron                    |
| TPR-6        | D <sub>3h</sub> | Trigonal prism                |
| JPPY-6       | C <sub>5v</sub> | Johnson pentagonal pyramid J2 |

Table S9. Coordination geometries of Ln<sup>III</sup> outputted by SHAPE 2.1 software.

| Ln Center           | OP-8   | HPY-8  | HBPY-8 | CU-8   | SAPR-8 | TDD-8 | JGBF-8 | JETBPY-8 | JBTPR-8 | BTPR-8 | JSD-8 | TT-8   | ETBPY-8 |
|---------------------|--------|--------|--------|--------|--------|-------|--------|----------|---------|--------|-------|--------|---------|
| <b>3a-(Lu, Zn)</b>  |        |        |        |        |        |       |        |          |         |        |       |        |         |
| Lu1                 | 32.499 | 21.433 | 14.751 | 13.409 | 4.349  | 1.990 | 9.836  | 26.432   | 3.328   | 2.502  | 3.541 | 14.037 | 21.218  |
| Lu2                 | 31.872 | 21.088 | 15.188 | 13.223 | 3.664  | 1.870 | 10.370 | 26.243   | 3.347   | 2.563  | 3.374 | 13.853 | 21.026  |
| <b>3b-(Lu, Zn)</b>  |        |        |        |        |        |       |        |          |         |        |       |        |         |
| Lu1                 | 32.432 | 21.722 | 14.435 | 13.711 | 4.048  | 1.930 | 9.595  | 26.277   | 3.370   | 2.749  | 3.402 | 14.313 | 21.517  |
| <b>3c-(Lu, Zn)</b>  |        |        |        |        |        |       |        |          |         |        |       |        |         |
| Lu1                 | 31.557 | 21.658 | 14.918 | 13.297 | 3.633  | 1.650 | 10.216 | 26.460   | 3.304   | 2.654  | 3.218 | 14.006 | 21.818  |
| Lu2                 | 32.158 | 21.613 | 14.757 | 13.600 | 3.950  | 1.857 | 9.873  | 26.144   | 3.387   | 2.582  | 3.293 | 14.263 | 21.055  |
| <b>3a'-(Dy, Co)</b> |        |        |        |        |        |       |        |          |         |        |       |        |         |
| Dy1                 | 32.862 | 21.356 | 14.511 | 13.577 | 4.239  | 1.971 | 9.678  | 26.476   | 3.478   | 2.574  | 3.617 | 14.235 | 21.369  |
| Dy2                 | 31.720 | 20.768 | 15.019 | 13.109 | 3.482  | 1.936 | 10.375 | 25.815   | 3.546   | 2.755  | 3.579 | 13.761 | 20.539  |

Table S10. Coordination geometries of Zn<sup>II</sup> or Co<sup>II</sup> outputted by SHAPE 2.1 software.

| Metal               | HP-6   | PPY-6  | OC-6  | TPR-6  | JPPY-6 |
|---------------------|--------|--------|-------|--------|--------|
| <b>3a-(Lu, Zn)</b>  |        |        |       |        |        |
| Zn1                 | 33.142 | 24.196 | 2.263 | 10.984 | 28.438 |
| Zn2                 | 33.717 | 24.575 | 2.595 | 11.152 | 28.210 |
| <b>3b-(Lu, Zn)</b>  |        |        |       |        |        |
| Zn1                 | 33.409 | 24.265 | 2.474 | 9.994  | 27.804 |
| <b>3c-(Lu, Zn)</b>  |        |        |       |        |        |
| Zn1                 | 33.146 | 23.537 | 2.934 | 8.972  | 26.872 |
| Zn2                 | 32.963 | 23.168 | 3.042 | 8.718  | 26.586 |
| <b>3a'-(Dy, Co)</b> |        |        |       |        |        |
| Co1                 | 33.750 | 22.687 | 3.199 | 9.468  | 26.480 |
| Co2                 | 34.216 | 23.334 | 3.127 | 10.391 | 27.577 |

---

## 7. Reference

1. Z. Asadi, M. Golchin, V. Eigner, M. Dusek and Z. Amirghofran, *Inorg. Chim. Acta*, 2017, **465**, 50.
2. C. D. Buch, S. H. Hansen, C. M. Tram, D. Mitcov and S. Piligkos, *Inorg. Chem.*, 2020, **59**, 16328.
3. G. M. Sheldrick, *Acta Crystallogr C Struct Chem*, 2015, **71**, 3.
4. A. L. Spek, *Appl. Crystallogr.*, 2003, **36**, 7.
5. D. Casanova, M. Llunell, P. Alemany and S. Alvarez, *Chem. Eur. J.*, 2005, **11**, 1479.
